# Supplementary material for: Representing climate evolution in ensembles of GCM simulations for the Hudson Bay System
Source: Oxford University Press journal article supplement (doi:10.1525/elementa.2021.00011), 2021-01-01
Supplement: braun_et_al_2021_supplementalmaterial.docx [file braun_et_al_2021_supplementalmaterial.docx]

**Supplemental Material**

Representing climate evolution in ensembles of GCM simulations for the Hudson Bay System

Marco Braun1,*, Alida N. Thiombiano3,Michael J.F. Vieira2, Tricia A. Stadnyk3

1Ouranos Consortium, Montreal, Quebec, Canada

2Manitoba Hydro, Winnipeg, Manitoba, Canada

3University of Calgary, Department of Geography, Calgary, Alberta, Canada

*[Braun.Marco@ouranos.ca](mailto:Braun.Marco@ouranos.ca)

**List of Contents**

**Figure S1. The 10th percentile-based thresholds derived from the 1981-2010 base period.**

The 10th percentile gridded thresholds generated from the daily minimum temperature (TN) are presented for the calendar day January 1st.

**Figure S2.** **The 10th percentile-based thresholds derived from the 1981-2010 base period.**

The 10th percentile gridded thresholds generated from the daily minimum temperature (TN) are presented for the calendar day July 1st.

**Figure S3. The 90th percentile-based thresholds derived from the 1981-2010 base period.**

The 90th percentile gridded thresholds generated from the daily maximum temperature (TX) are presented for the calendar day January 1st.

**Figure S4. The 90th percentile-based thresholds derived from the 1981-2010 base period.**

The 90th percentile gridded thresholds generated from the daily maximum temperature (TX) are presented for the calendar day July 1st.

**Figure S5. Trend in ENS and SUB TXx annual means time series over the period 1981-2070.**

The non-linear blue and red lines represent ENS and SUB means respectively; the solid linear blue and red lines show ENS and SUB Mann-Kendall significant trends respectively; the light blue and red shading highlight respectively ENS and SUB simulations data range.

**Figure S6. Trend in ENS and SUB TNn annual means time series over the period 1981-2070.**

The non-linear blue and red lines represent ENS and SUB means respectively; the solid linear blue and red lines show ENS and SUB Mann-Kendall significant trends respectively; the light blue and red shading highlight respectively ENS and SUB simulations data range.

**Figure S7. Trend in ENS and SUB TX90p annual means time series over the period 1981-2070.**

The non-linear blue and red lines represent ENS and SUB means respectively; the solid linear blue and red lines show ENS and SUB Mann-Kendall significant trends respectively; the light blue and red shading highlight respectively ENS and SUB simulations data range.

**Figure S8. Trend in ENS and SUB TN10p annual means time series over the period 1981-2070.**

The non-linear blue and red lines represent ENS and SUB means respectively; the solid linear blue and red lines show ENS and SUB Mann-Kendall significant trends respectively; the light blue and red shading highlight respectively ENS and SUB simulations data range.

**Figure S9. Trend in ENS and SUB FD annual means time series over the period 1981-2070.**

The non-linear blue and red lines represent ENS and SUB means respectively; the solid linear blue and red lines show ENS and SUB Mann-Kendall significant trends respectively; the light blue and red shading highlight respectively ENS and SUB simulations data range.

**Figure S10. Trend in ENS and SUB ID annual means time series over the period 1981-2070.**

The non-linear blue and red lines represent ENS and SUB means respectively; the solid linear blue and red lines show ENS and SUB Mann-Kendall significant trends respectively; the light blue and red shading highlight respectively ENS and SUB simulations data range.

**Figure S11. Trend in ENS and SUB PRCPTOT annual means time series over the period 1981-2070.**

The non-linear blue and red lines represent ENS and SUB means respectively; the solid linear blue and red lines show ENS and SUB Mann-Kendall significant trends respectively; the light blue and red shading highlight respectively ENS and SUB simulations data range.

**Figure S12. Trend in ENS and SUB RX5day annual means time series over the period 1981-2070.**

The non-linear blue and red lines represent ENS and SUB means respectively; the solid linear blue and red lines show ENS and SUB Mann-Kendall significant trends respectively; the light blue and red shading highlight respectively ENS and SUB simulations data range.

**Figure S13. Trend in ENS and SUB SDII annual means time series over the period 1981-2070.**

The non-linear blue and red lines represent ENS and SUB means respectively; the solid linear blue and red lines show ENS and SUB Mann-Kendall significant trends respectively; the light blue and red shading highlight respectively ENS and SUB simulations data range.

**Figure S14. Trend in ENS and SUB CDD annual means time series over the period 1981-2070.**

The non-linear blue and red lines represent ENS and SUB means respectively; the solid linear blue and red lines show ENS and SUB Mann-Kendall significant trends respectively; the light blue and red shading highlight respectively ENS and SUB simulations data range.


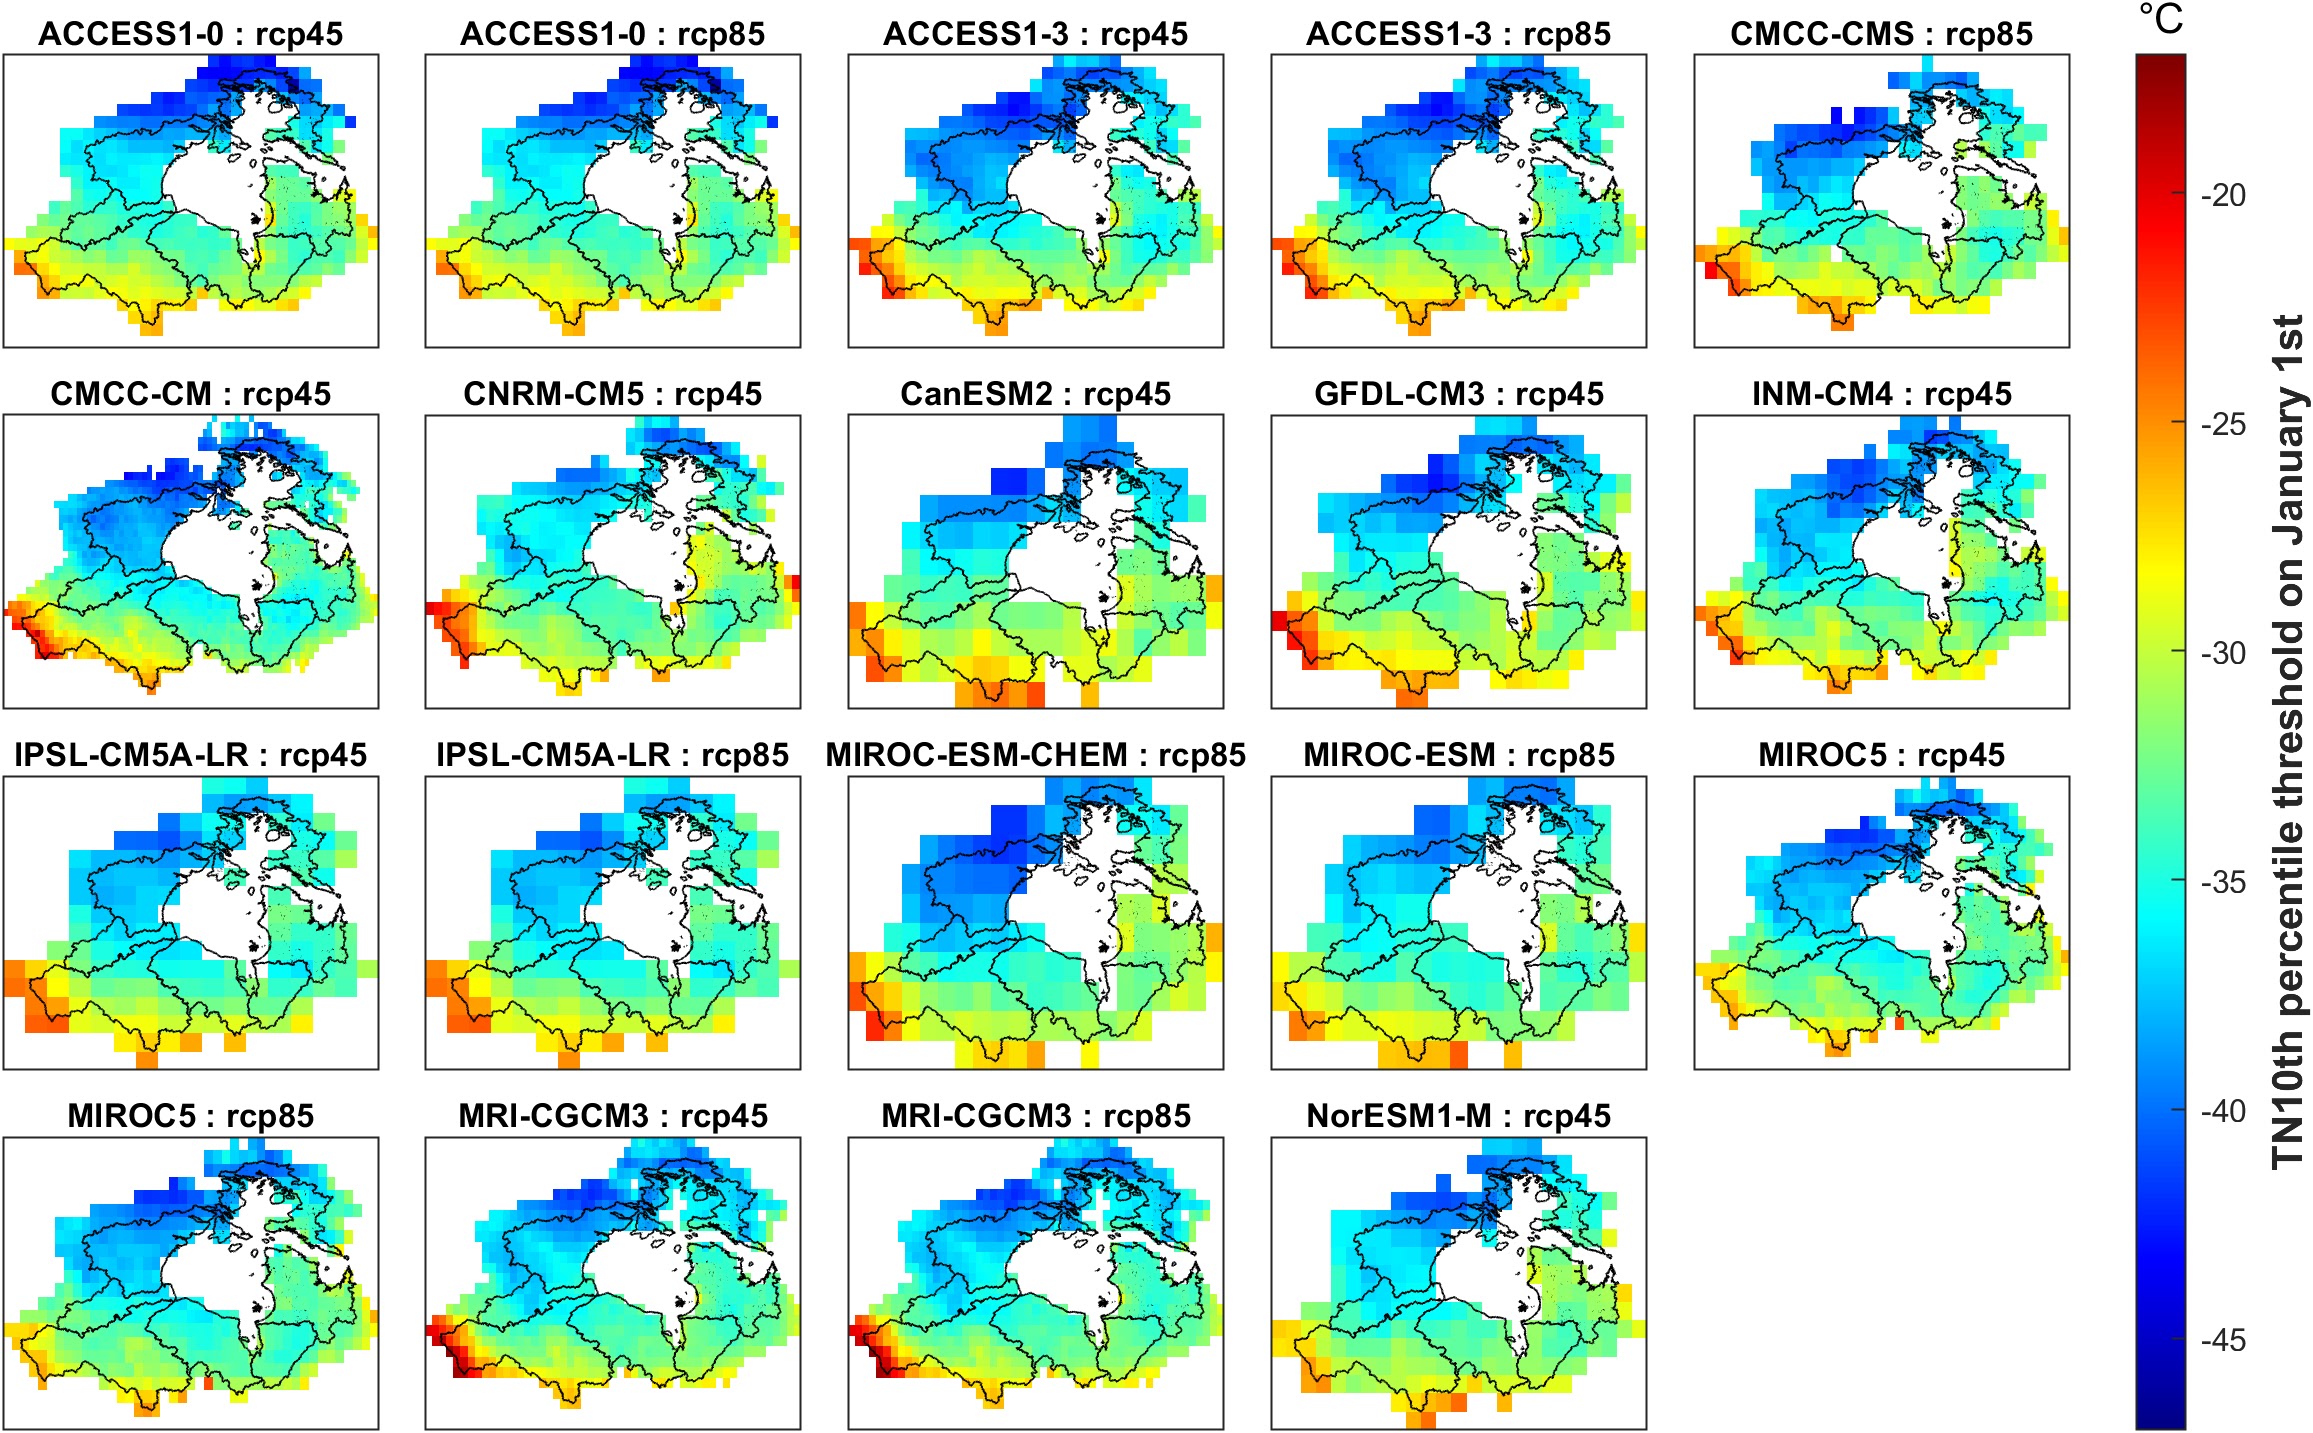


**Figure S1. The 10th percentile-based thresholds derived from the 1981-2010 base period.**

The 10th percentile gridded thresholds generated from the daily minimum temperature (TN) are presented for the calendar day January 1st.


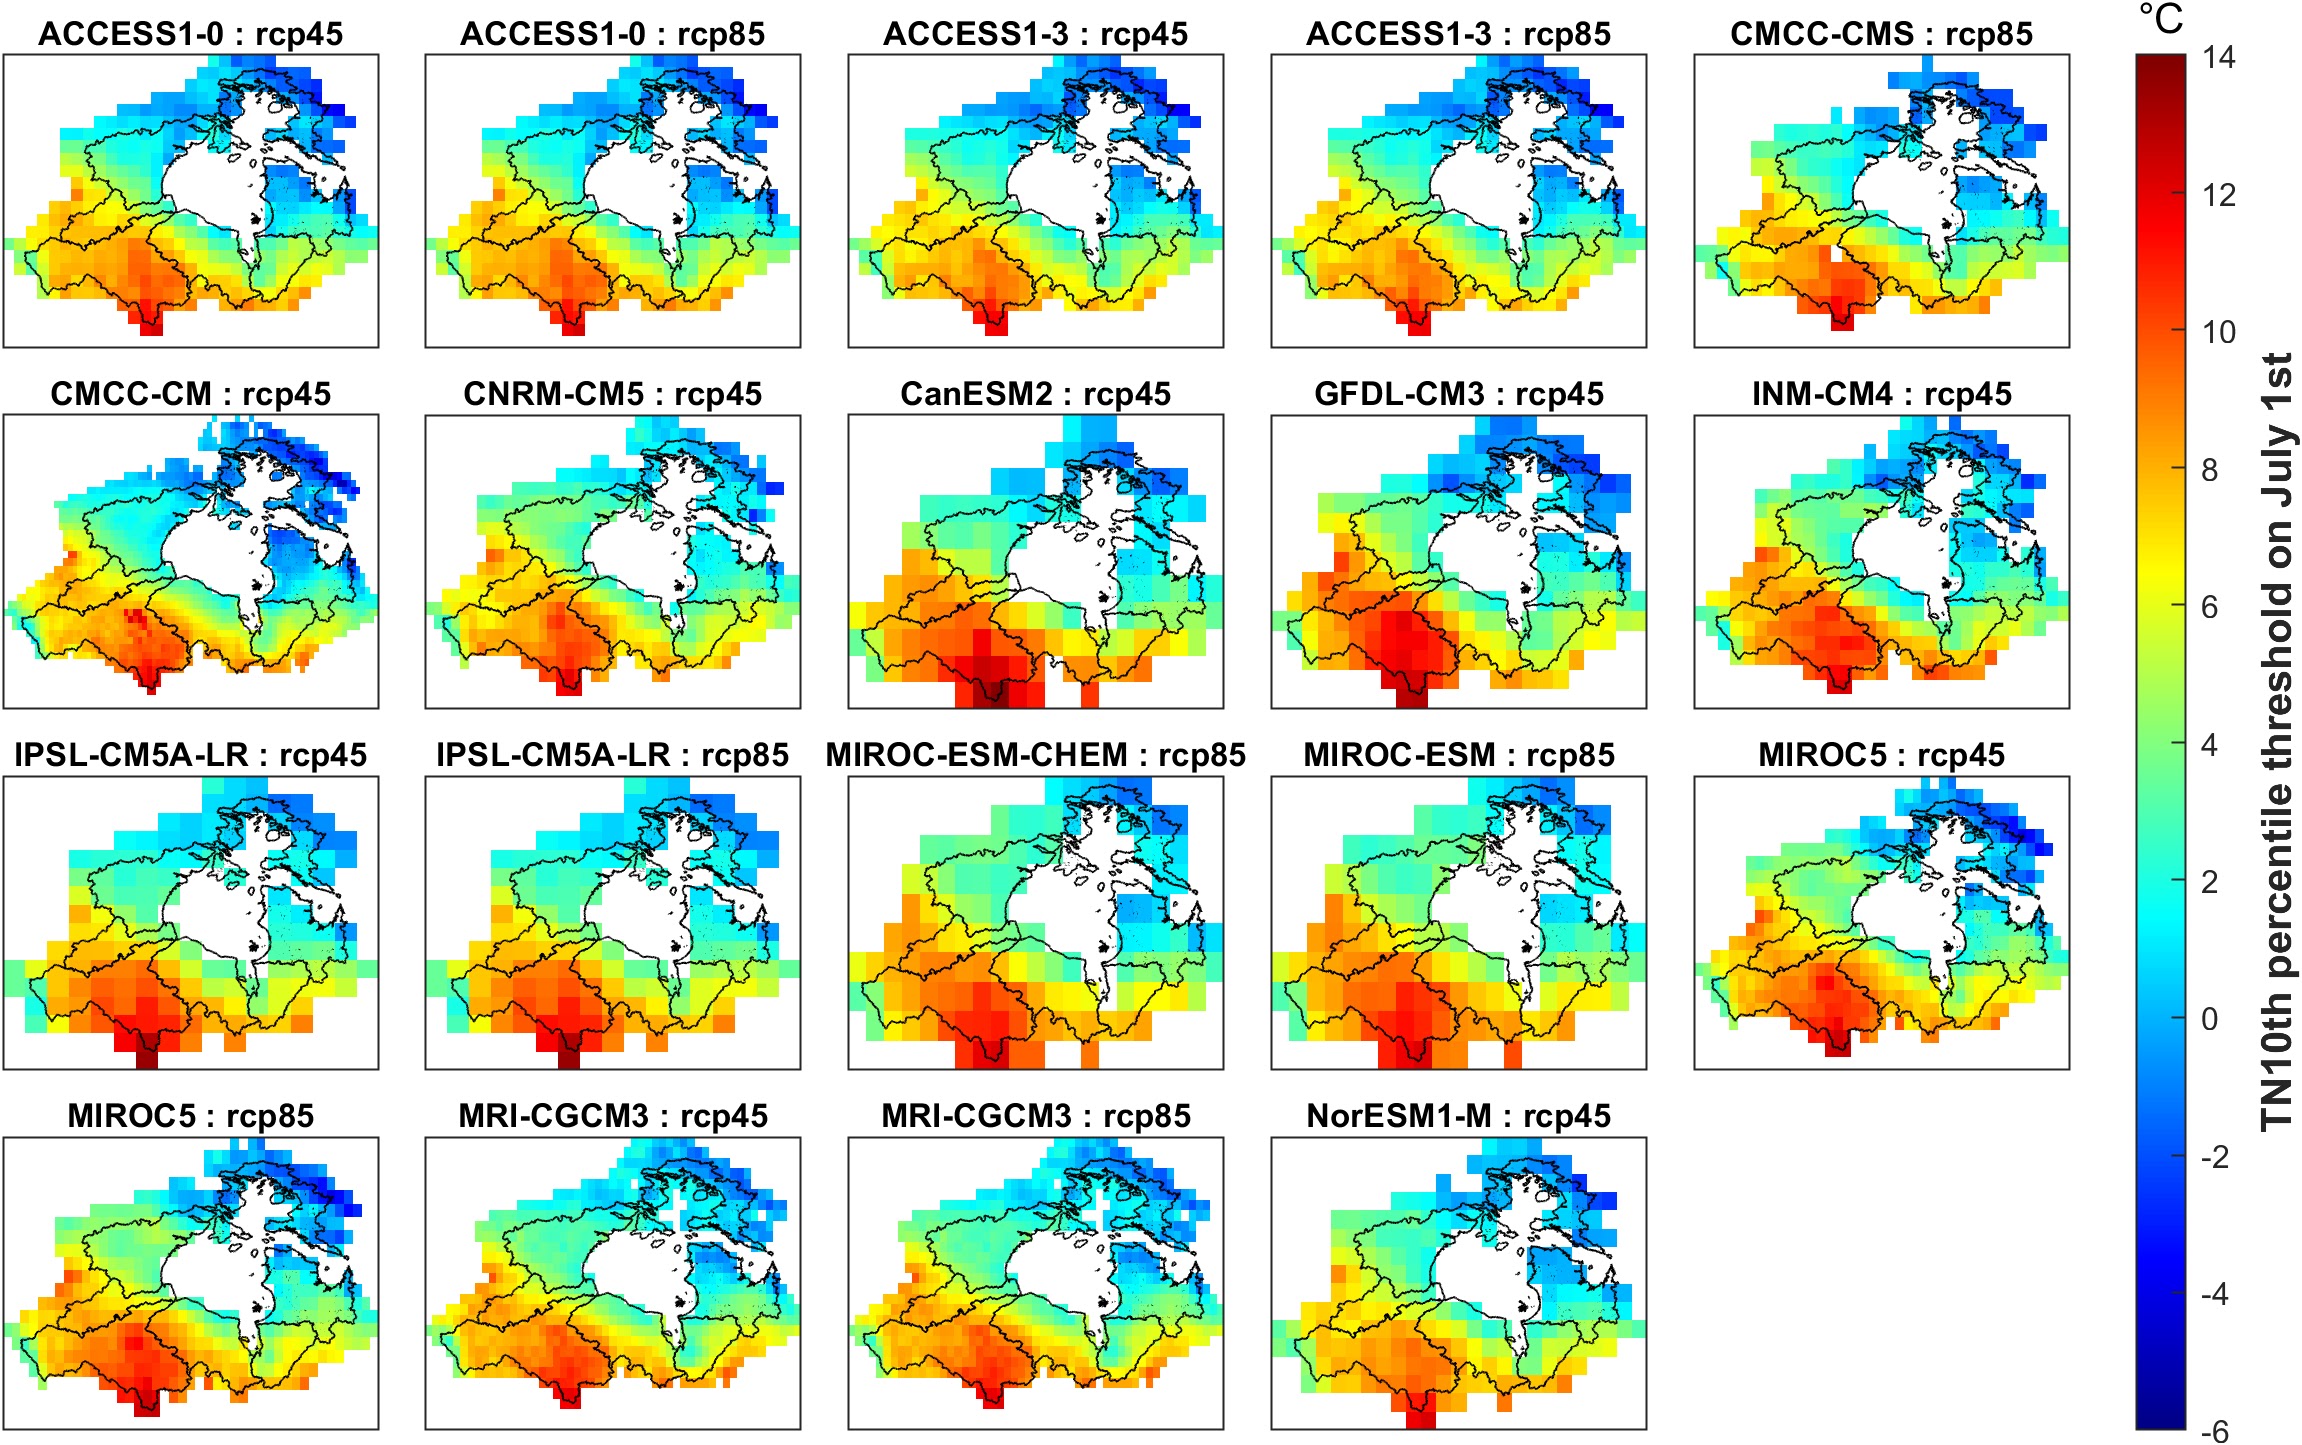


**Figure S2.** **The 10th percentile-based thresholds derived from the 1981-2010 base period.**

The 10th percentile gridded thresholds generated from the daily minimum temperature (TN) are presented for the calendar day July 1st.


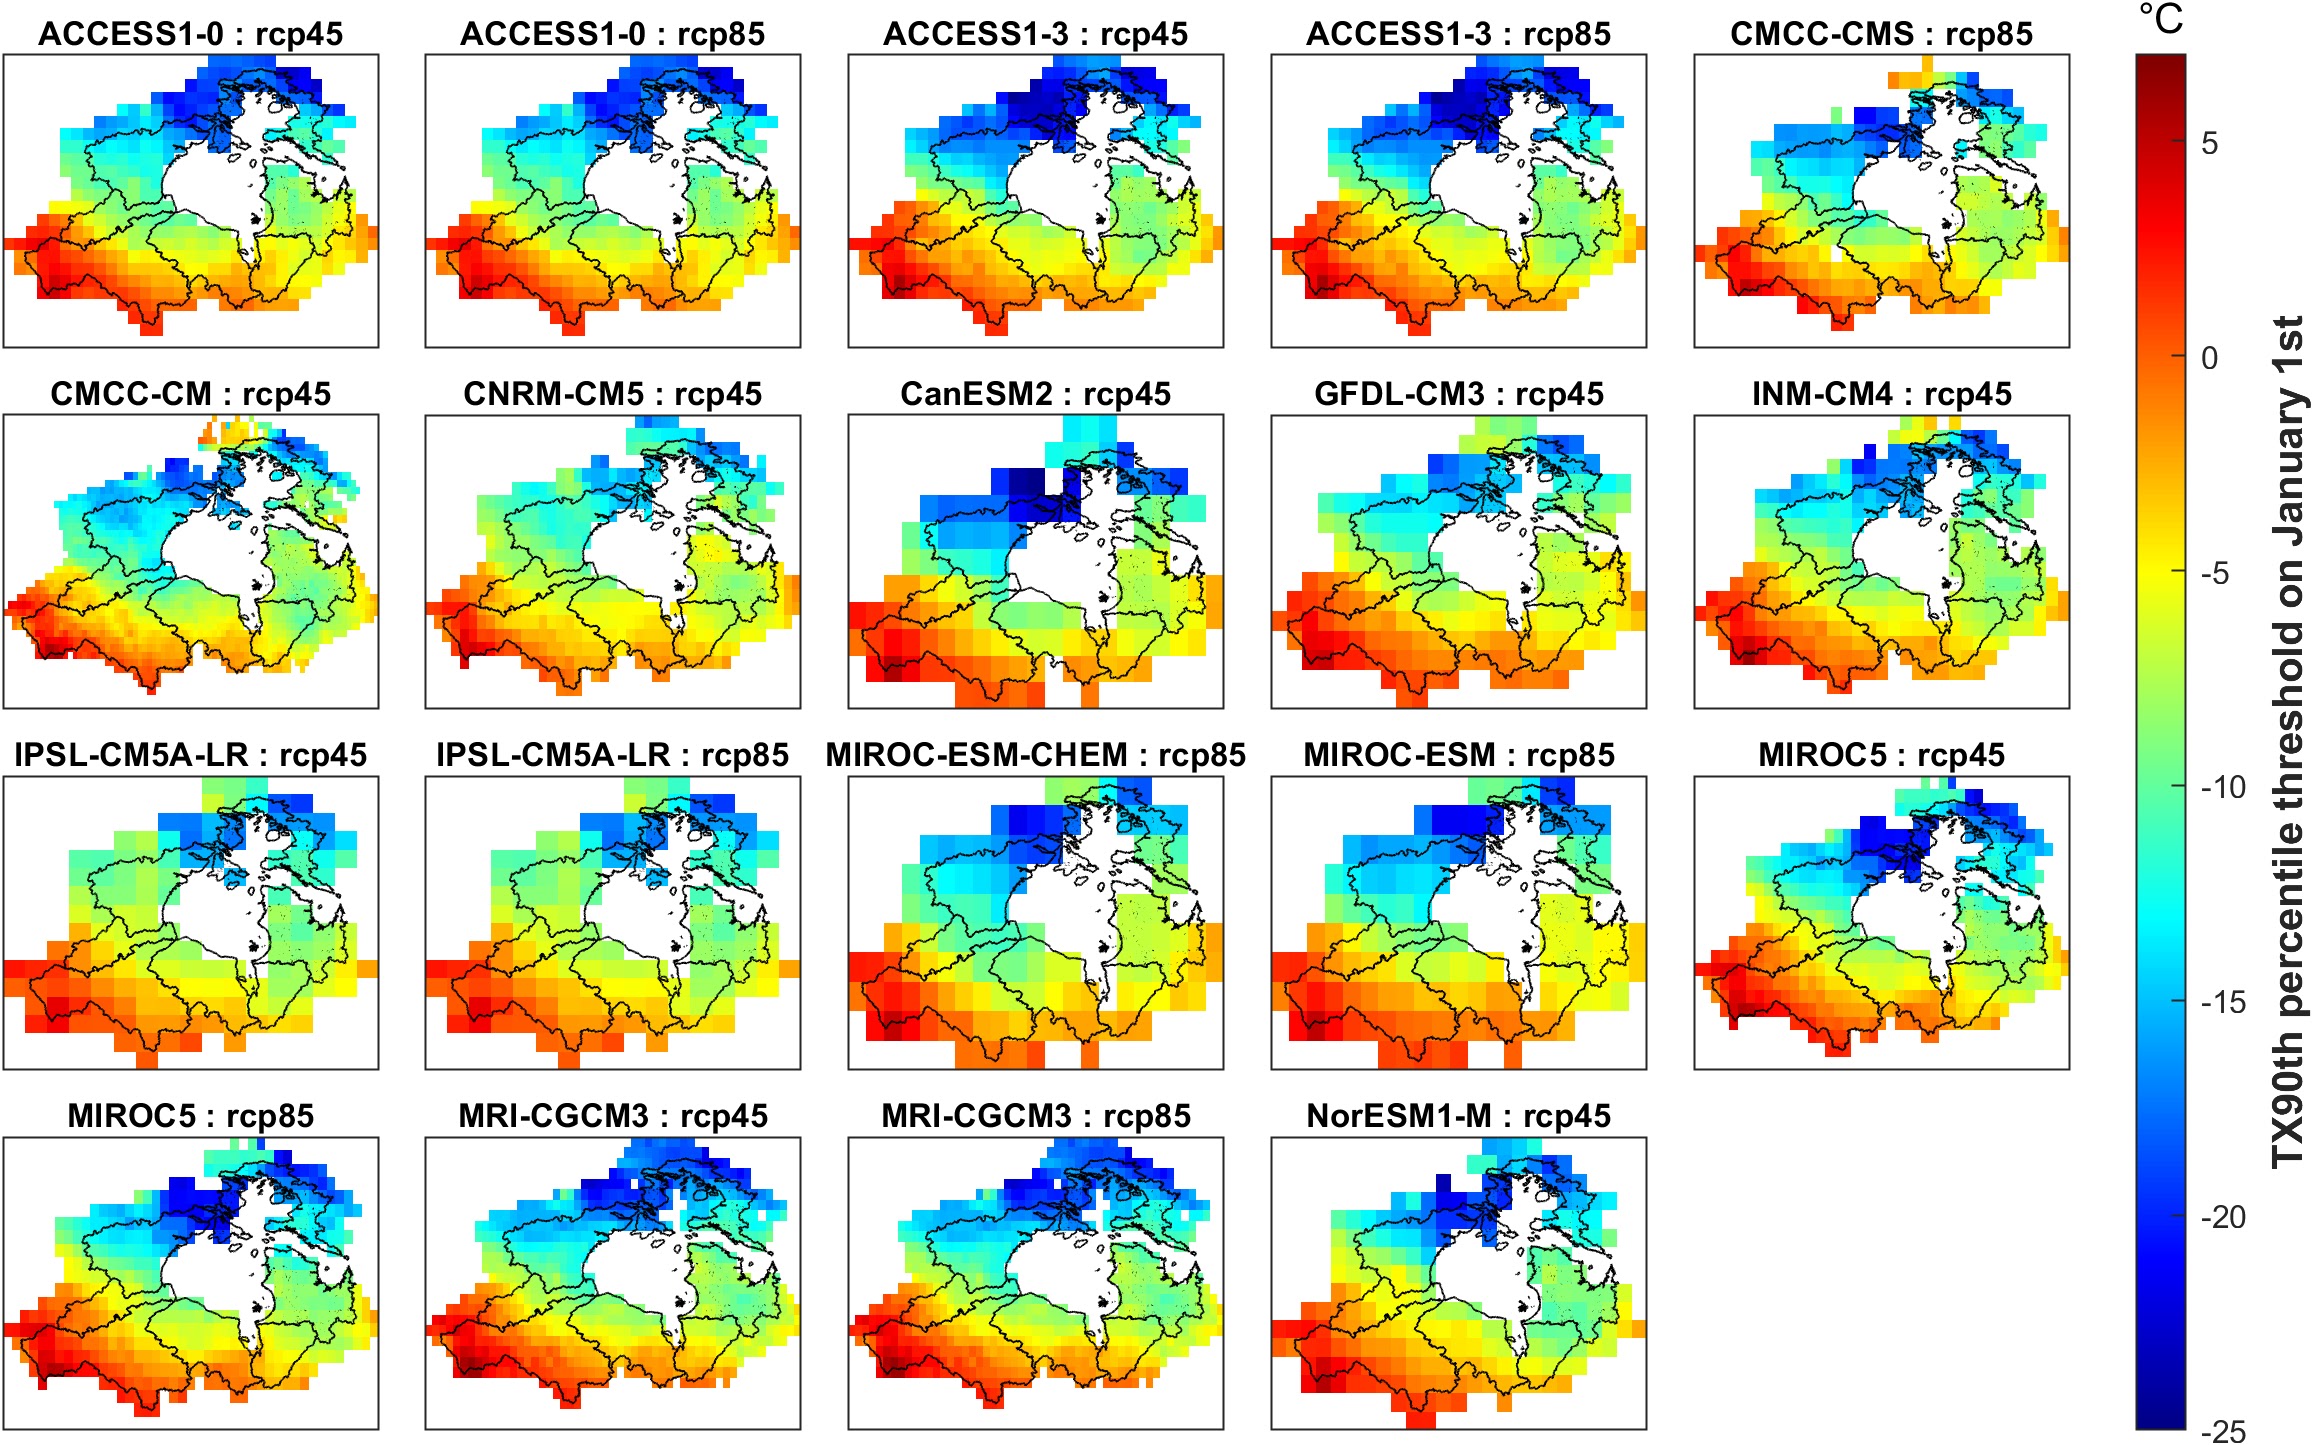


**Figure S3. The 90th percentile-based thresholds derived from the 1981-2010 base period.**

The 90th percentile gridded thresholds generated from the daily maximum temperature (TX) are presented for the calendar day January 1st.


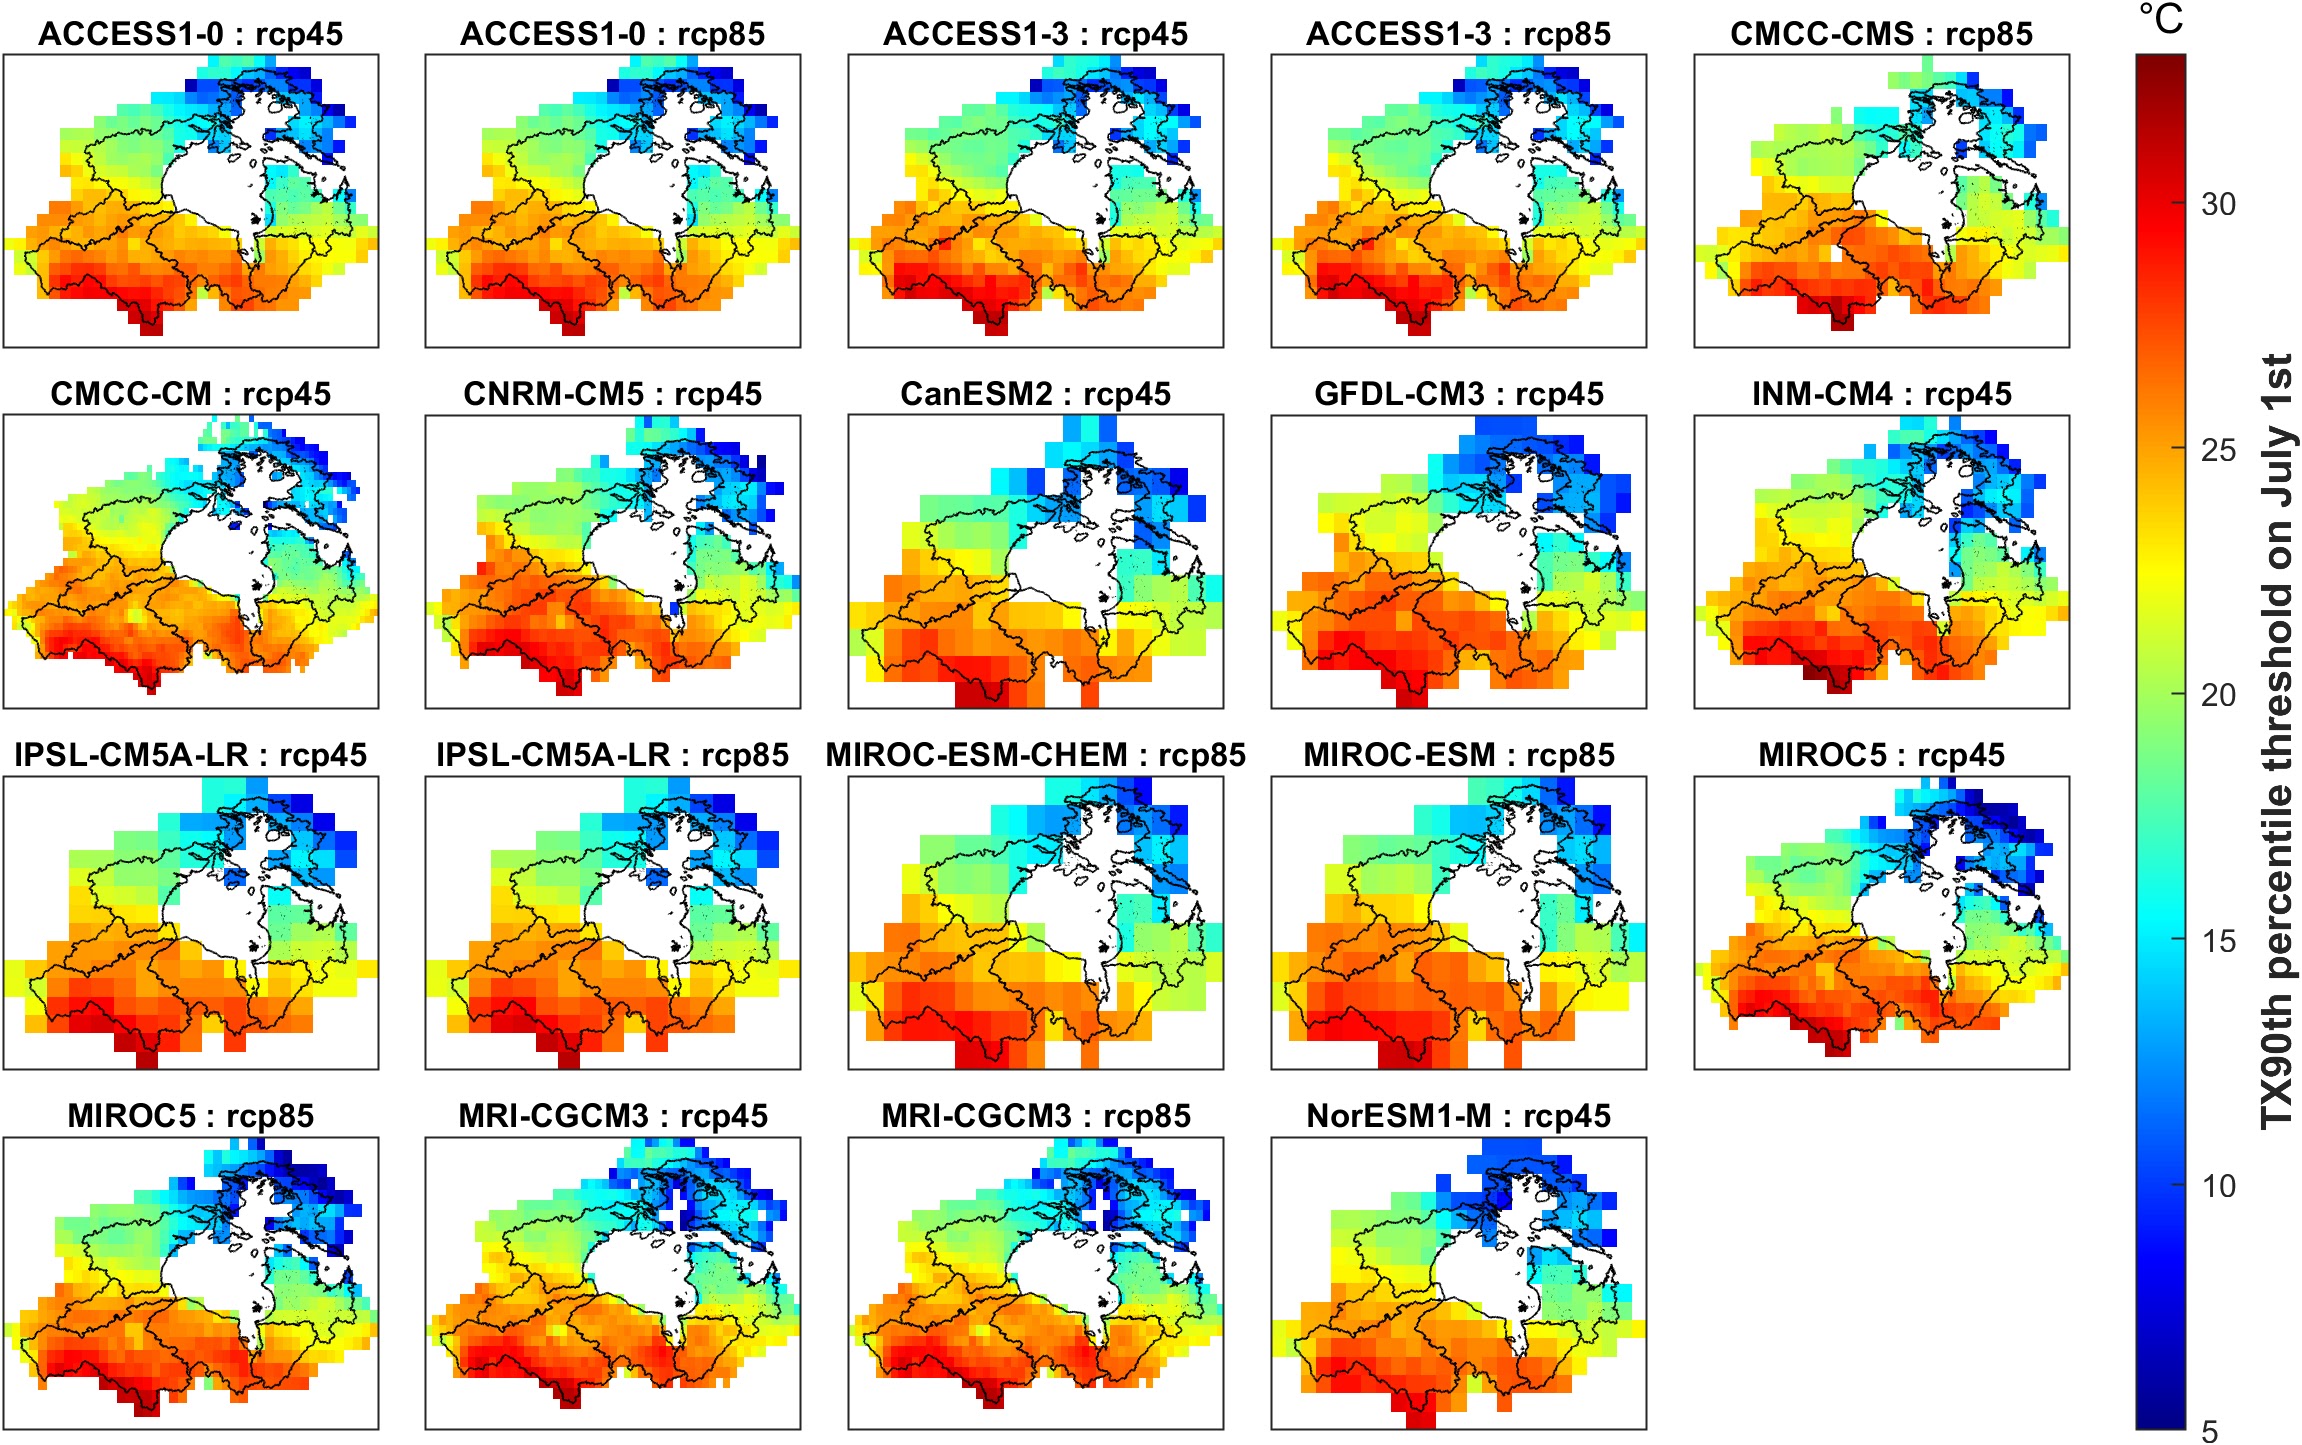


**Figure S4. The 90th percentile-based thresholds derived from the 1981-2010 base period.**

The 90th percentile gridded thresholds generated from the daily maximum temperature (TX) are presented for the calendar day July 1st.


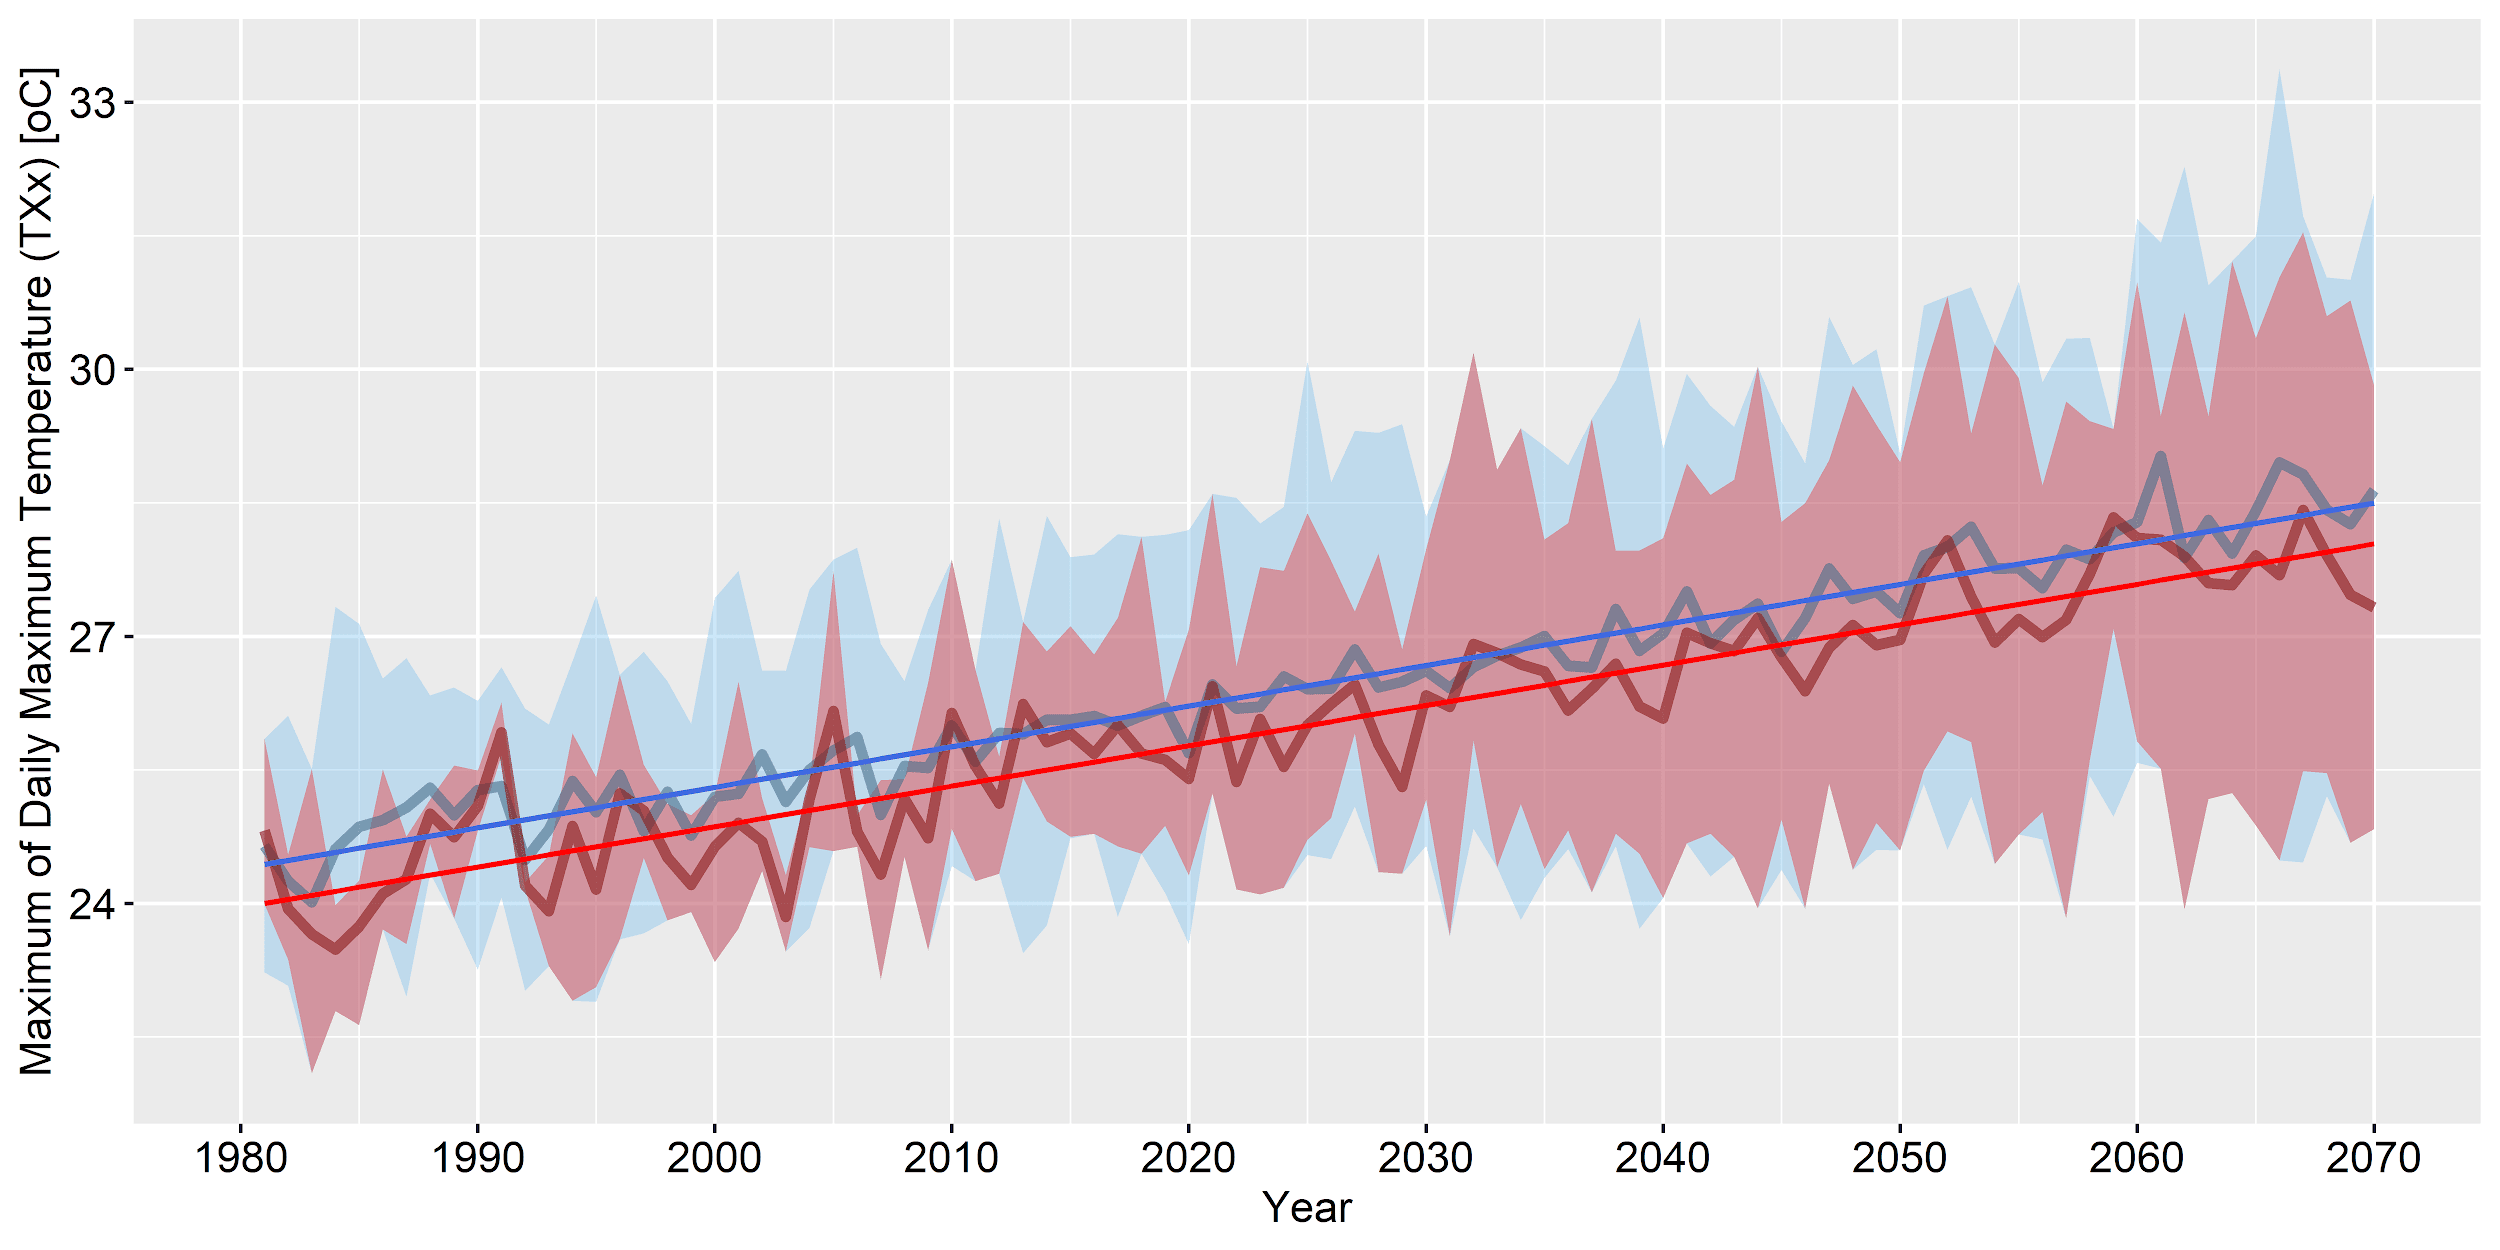


**Figure S5. Trend in ENS and SUB TXx annual means time series over the period 1981-2070.**

The non-linear blue and red lines represent ENS and SUB means respectively; the solid linear blue and red lines show ENS and SUB Mann-Kendall significant trends respectively; the light blue and red shading highlight respectively ENS and SUB simulations data range.


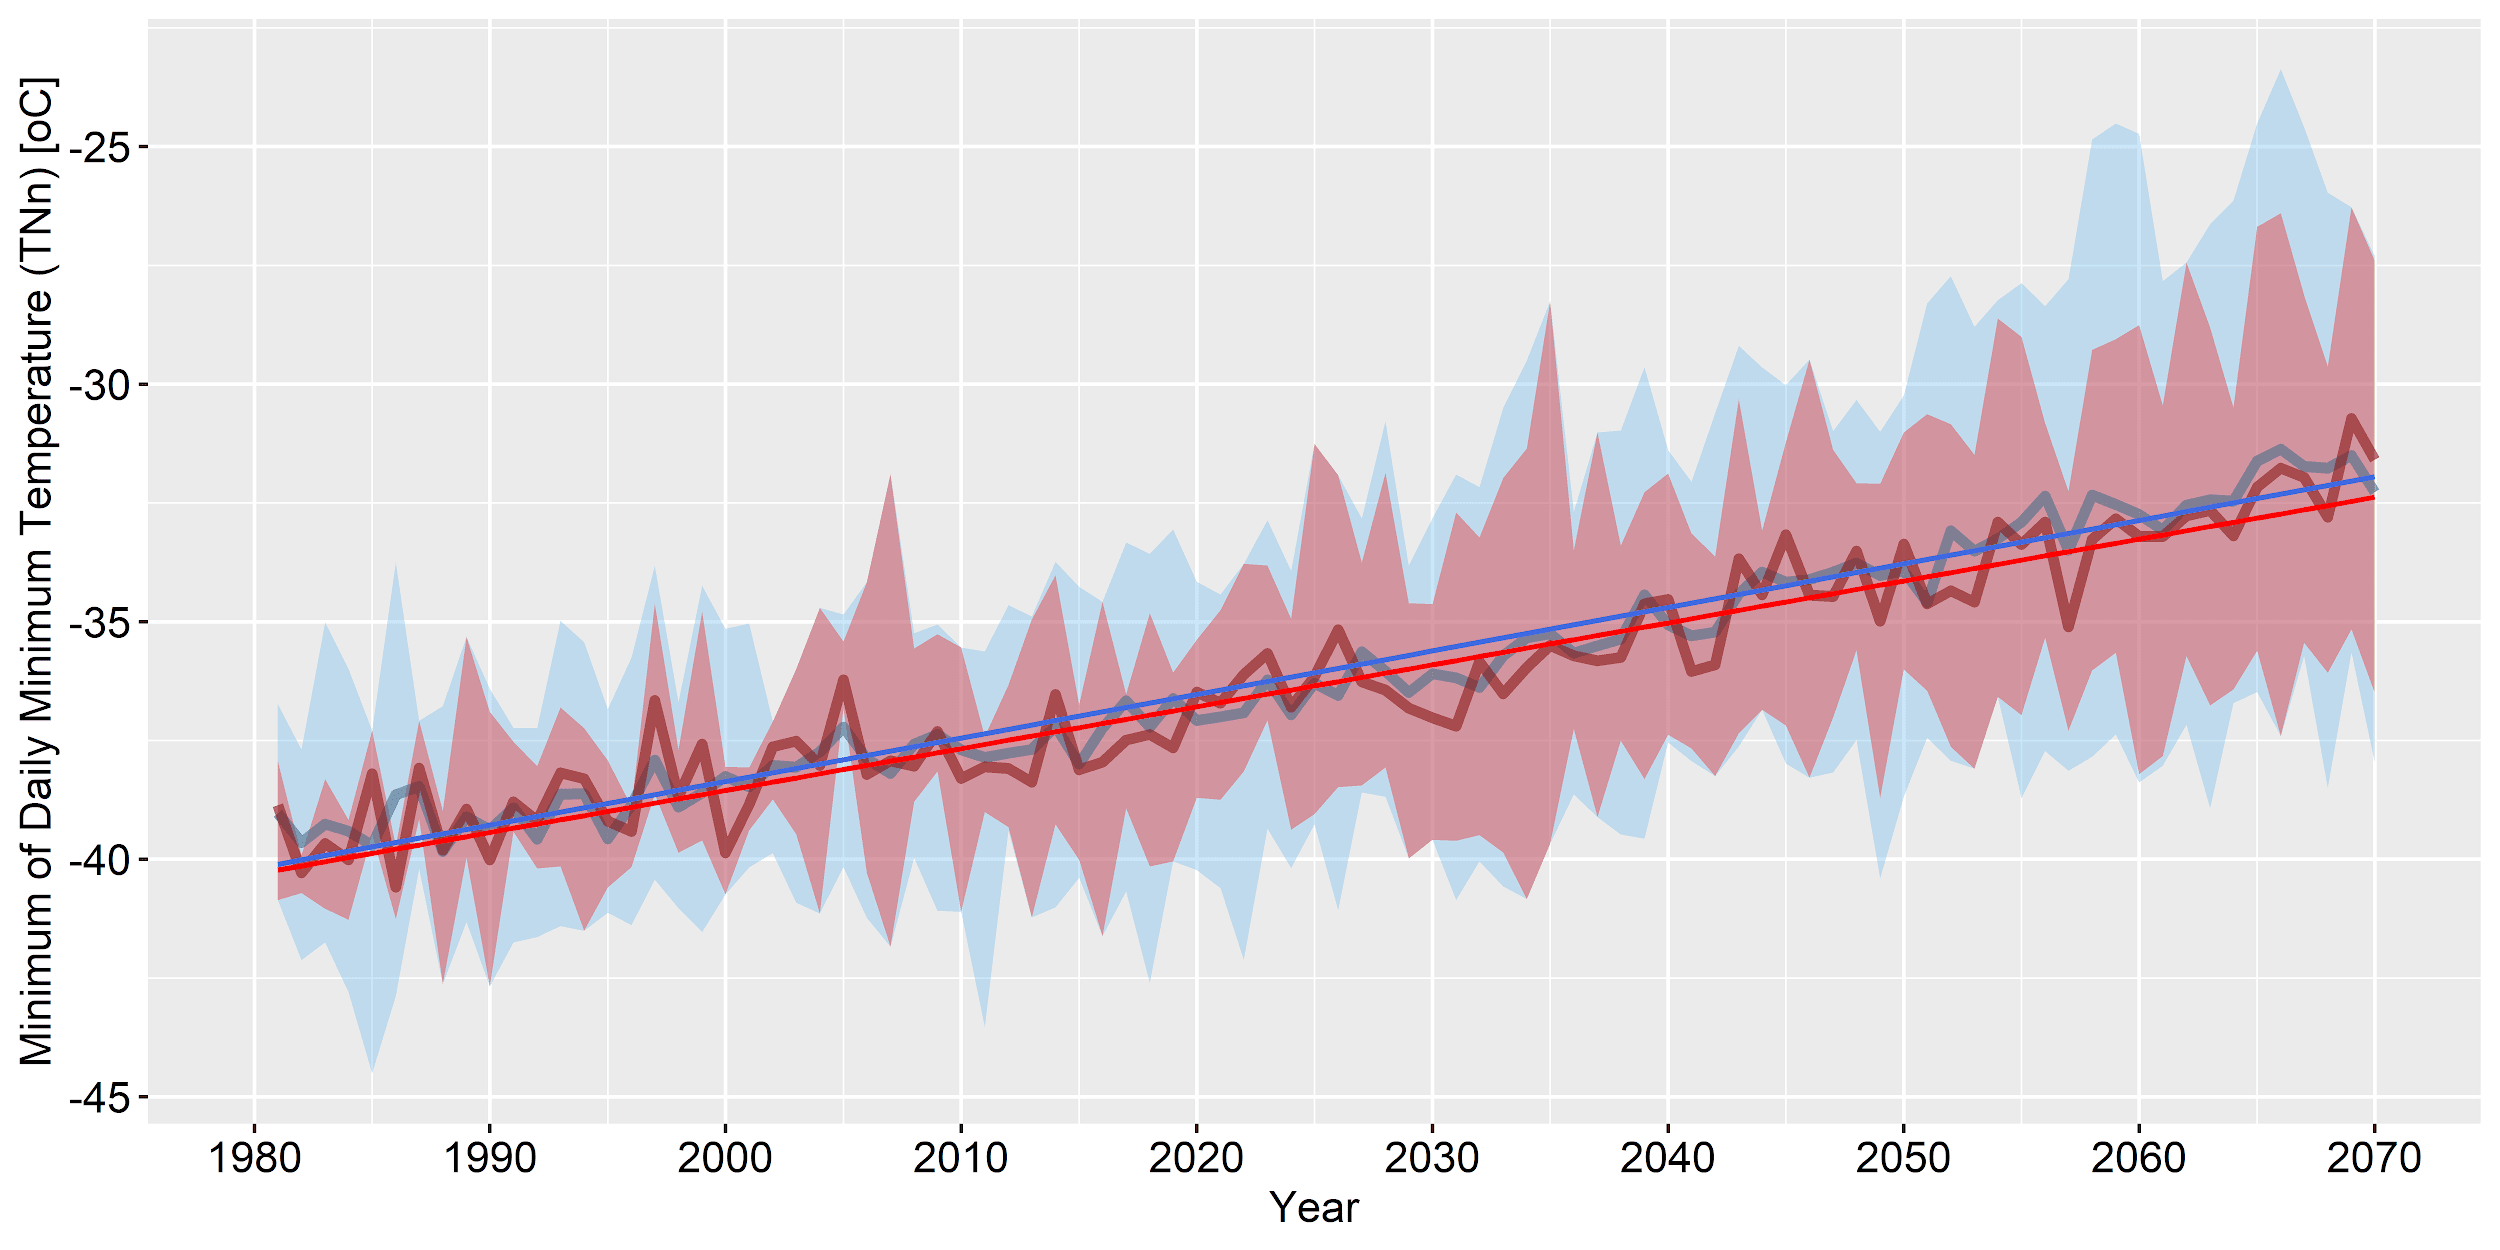


**Figure S6. Trend in ENS and SUB TNn annual means time series over the period 1981-2070.**

The non-linear blue and red lines represent ENS and SUB means respectively; the solid linear blue and red lines show ENS and SUB Mann-Kendall significant trends respectively; the light blue and red shading highlight respectively ENS and SUB simulations data range.


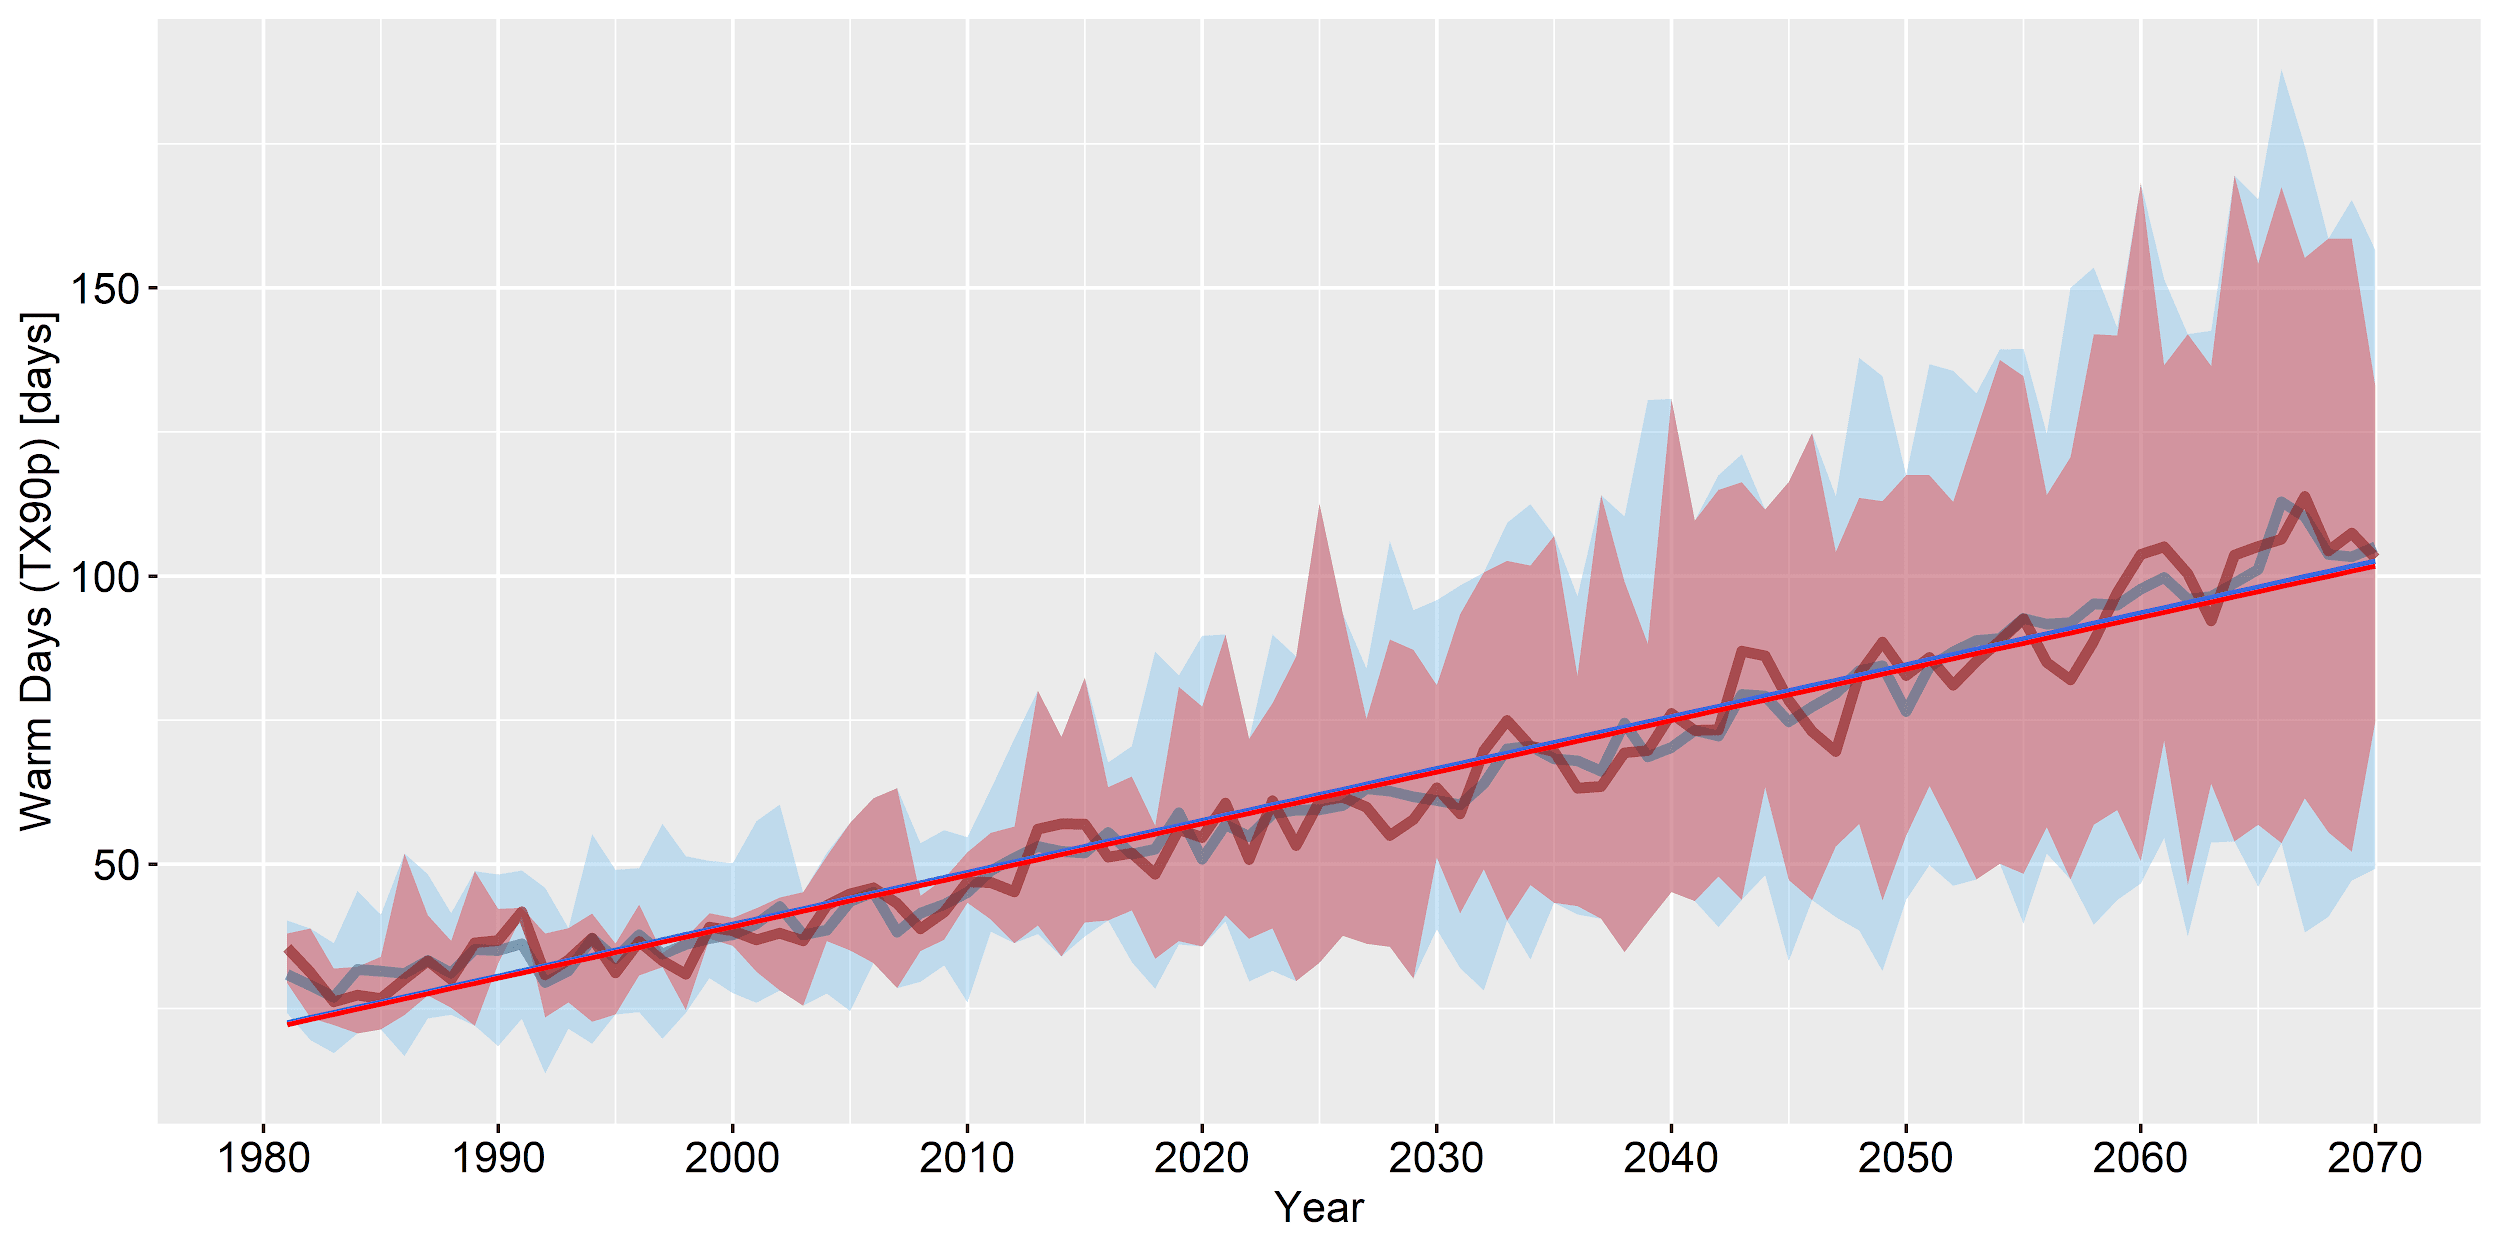


**Figure S7. Trend in ENS and SUB TX90p annual means time series over the period 1981-2070.**

The non-linear blue and red lines represent ENS and SUB means respectively; the solid linear blue and red lines show ENS and SUB Mann-Kendall significant trends respectively; the light blue and red shading highlight respectively ENS and SUB simulations data range.


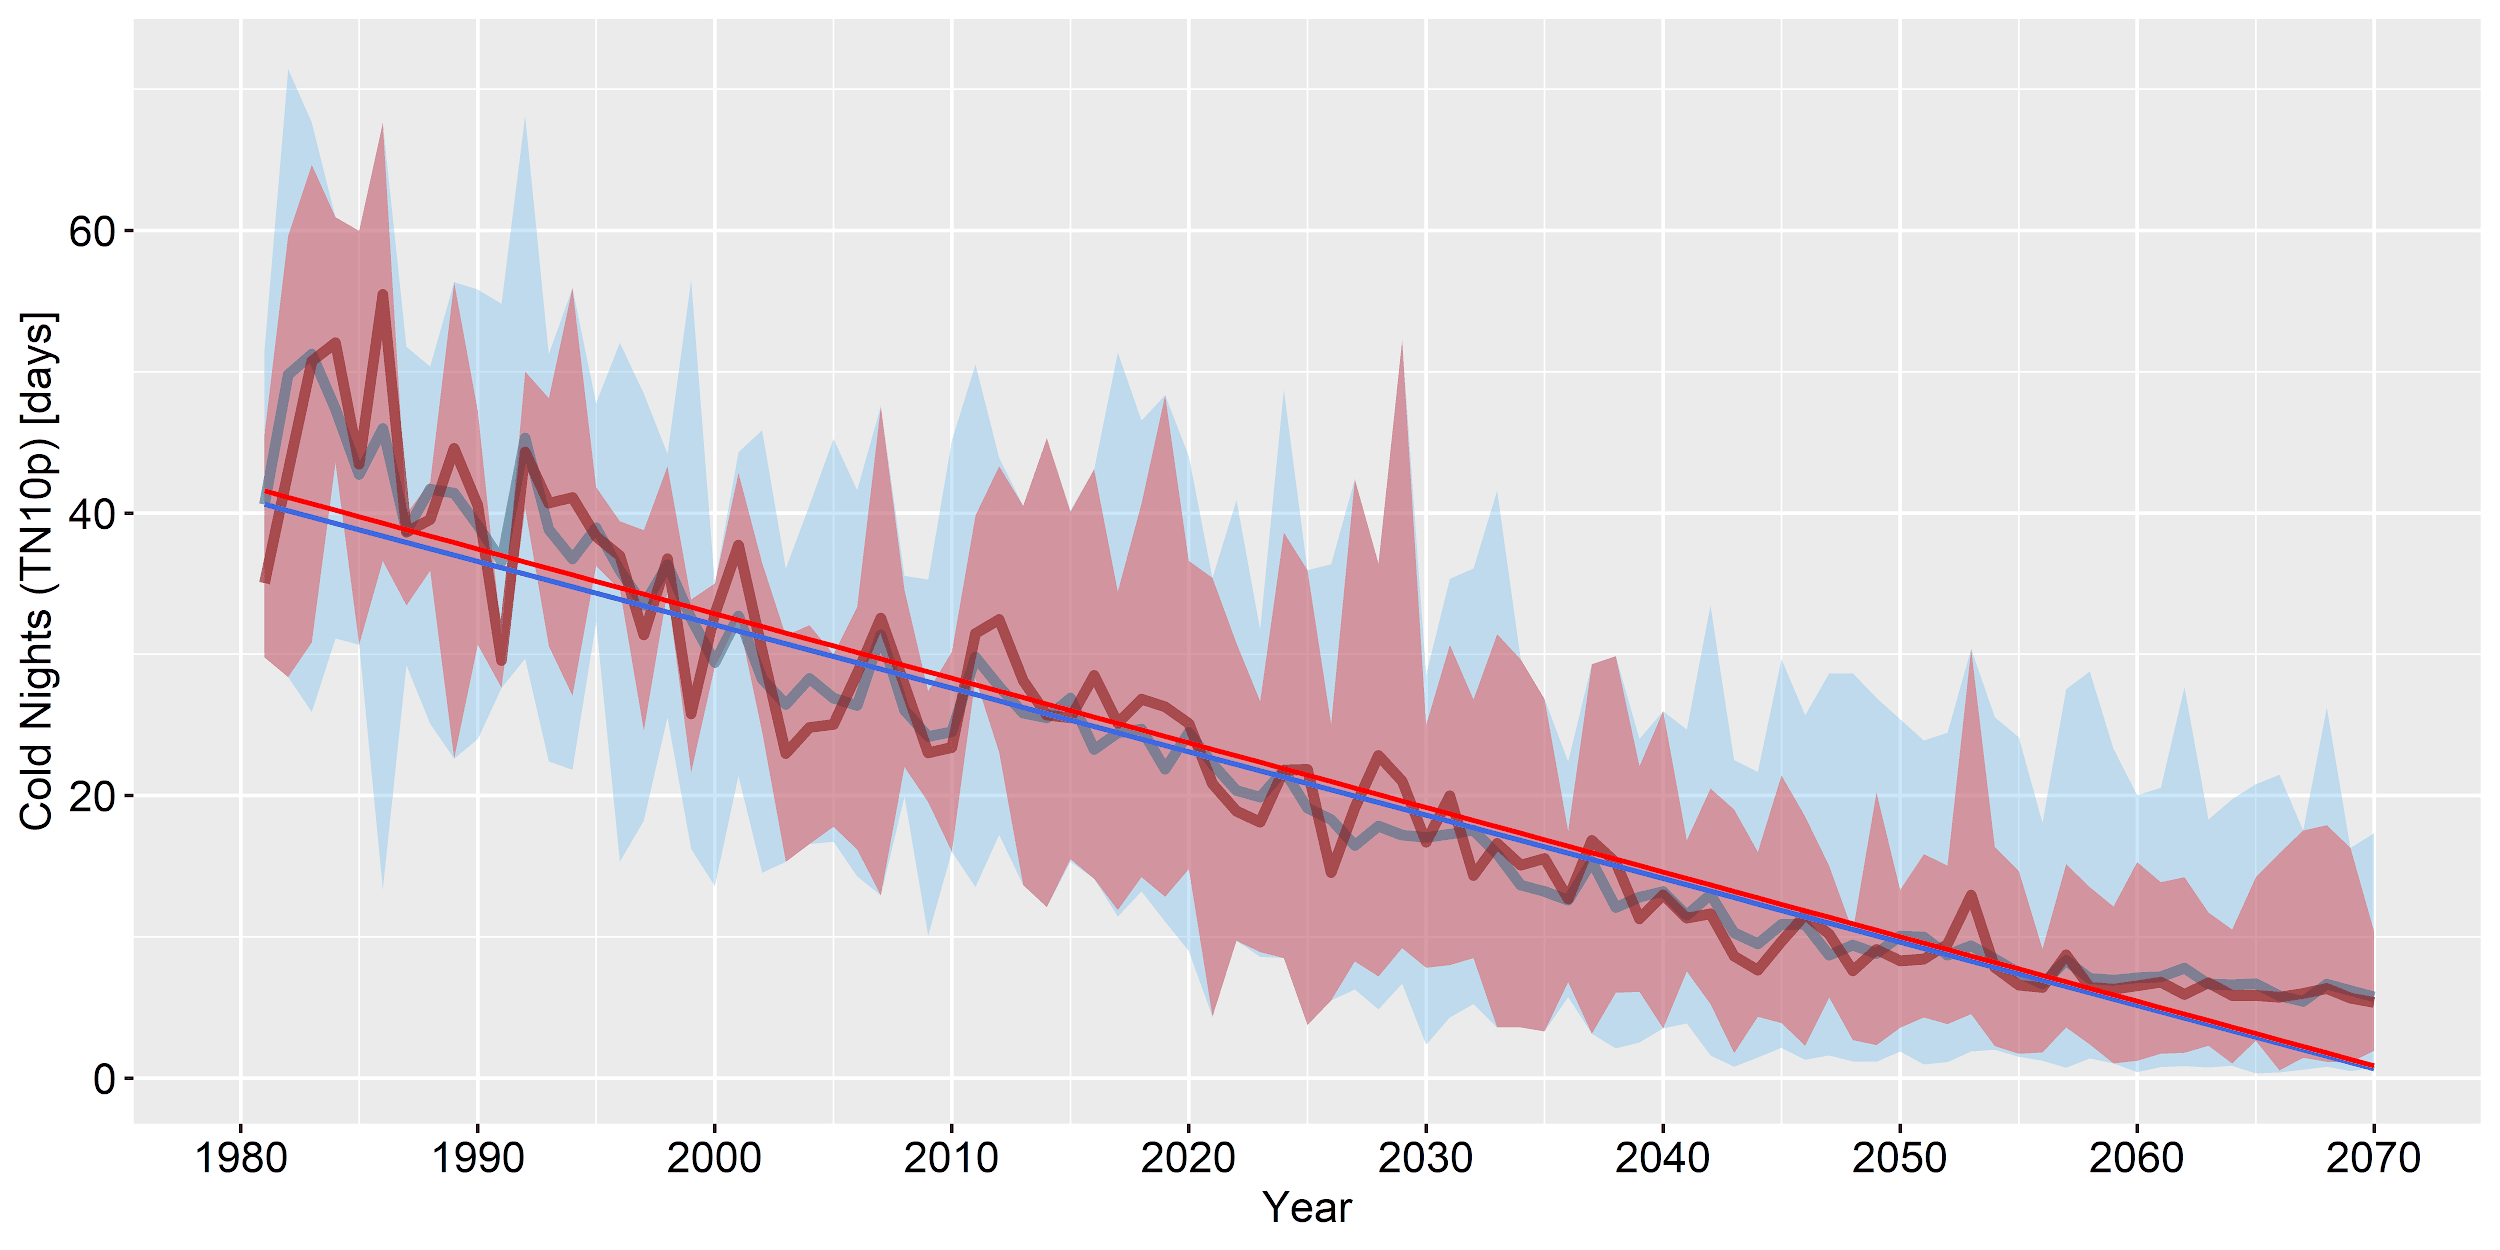


**Figure S8. Trend in ENS and SUB TN10p annual means time series over the period 1981-2070.**

The non-linear blue and red lines represent ENS and SUB means respectively; the solid linear blue and red lines show ENS and SUB Mann-Kendall significant trends respectively; the light blue and red shading highlight respectively ENS and SUB simulations data range.


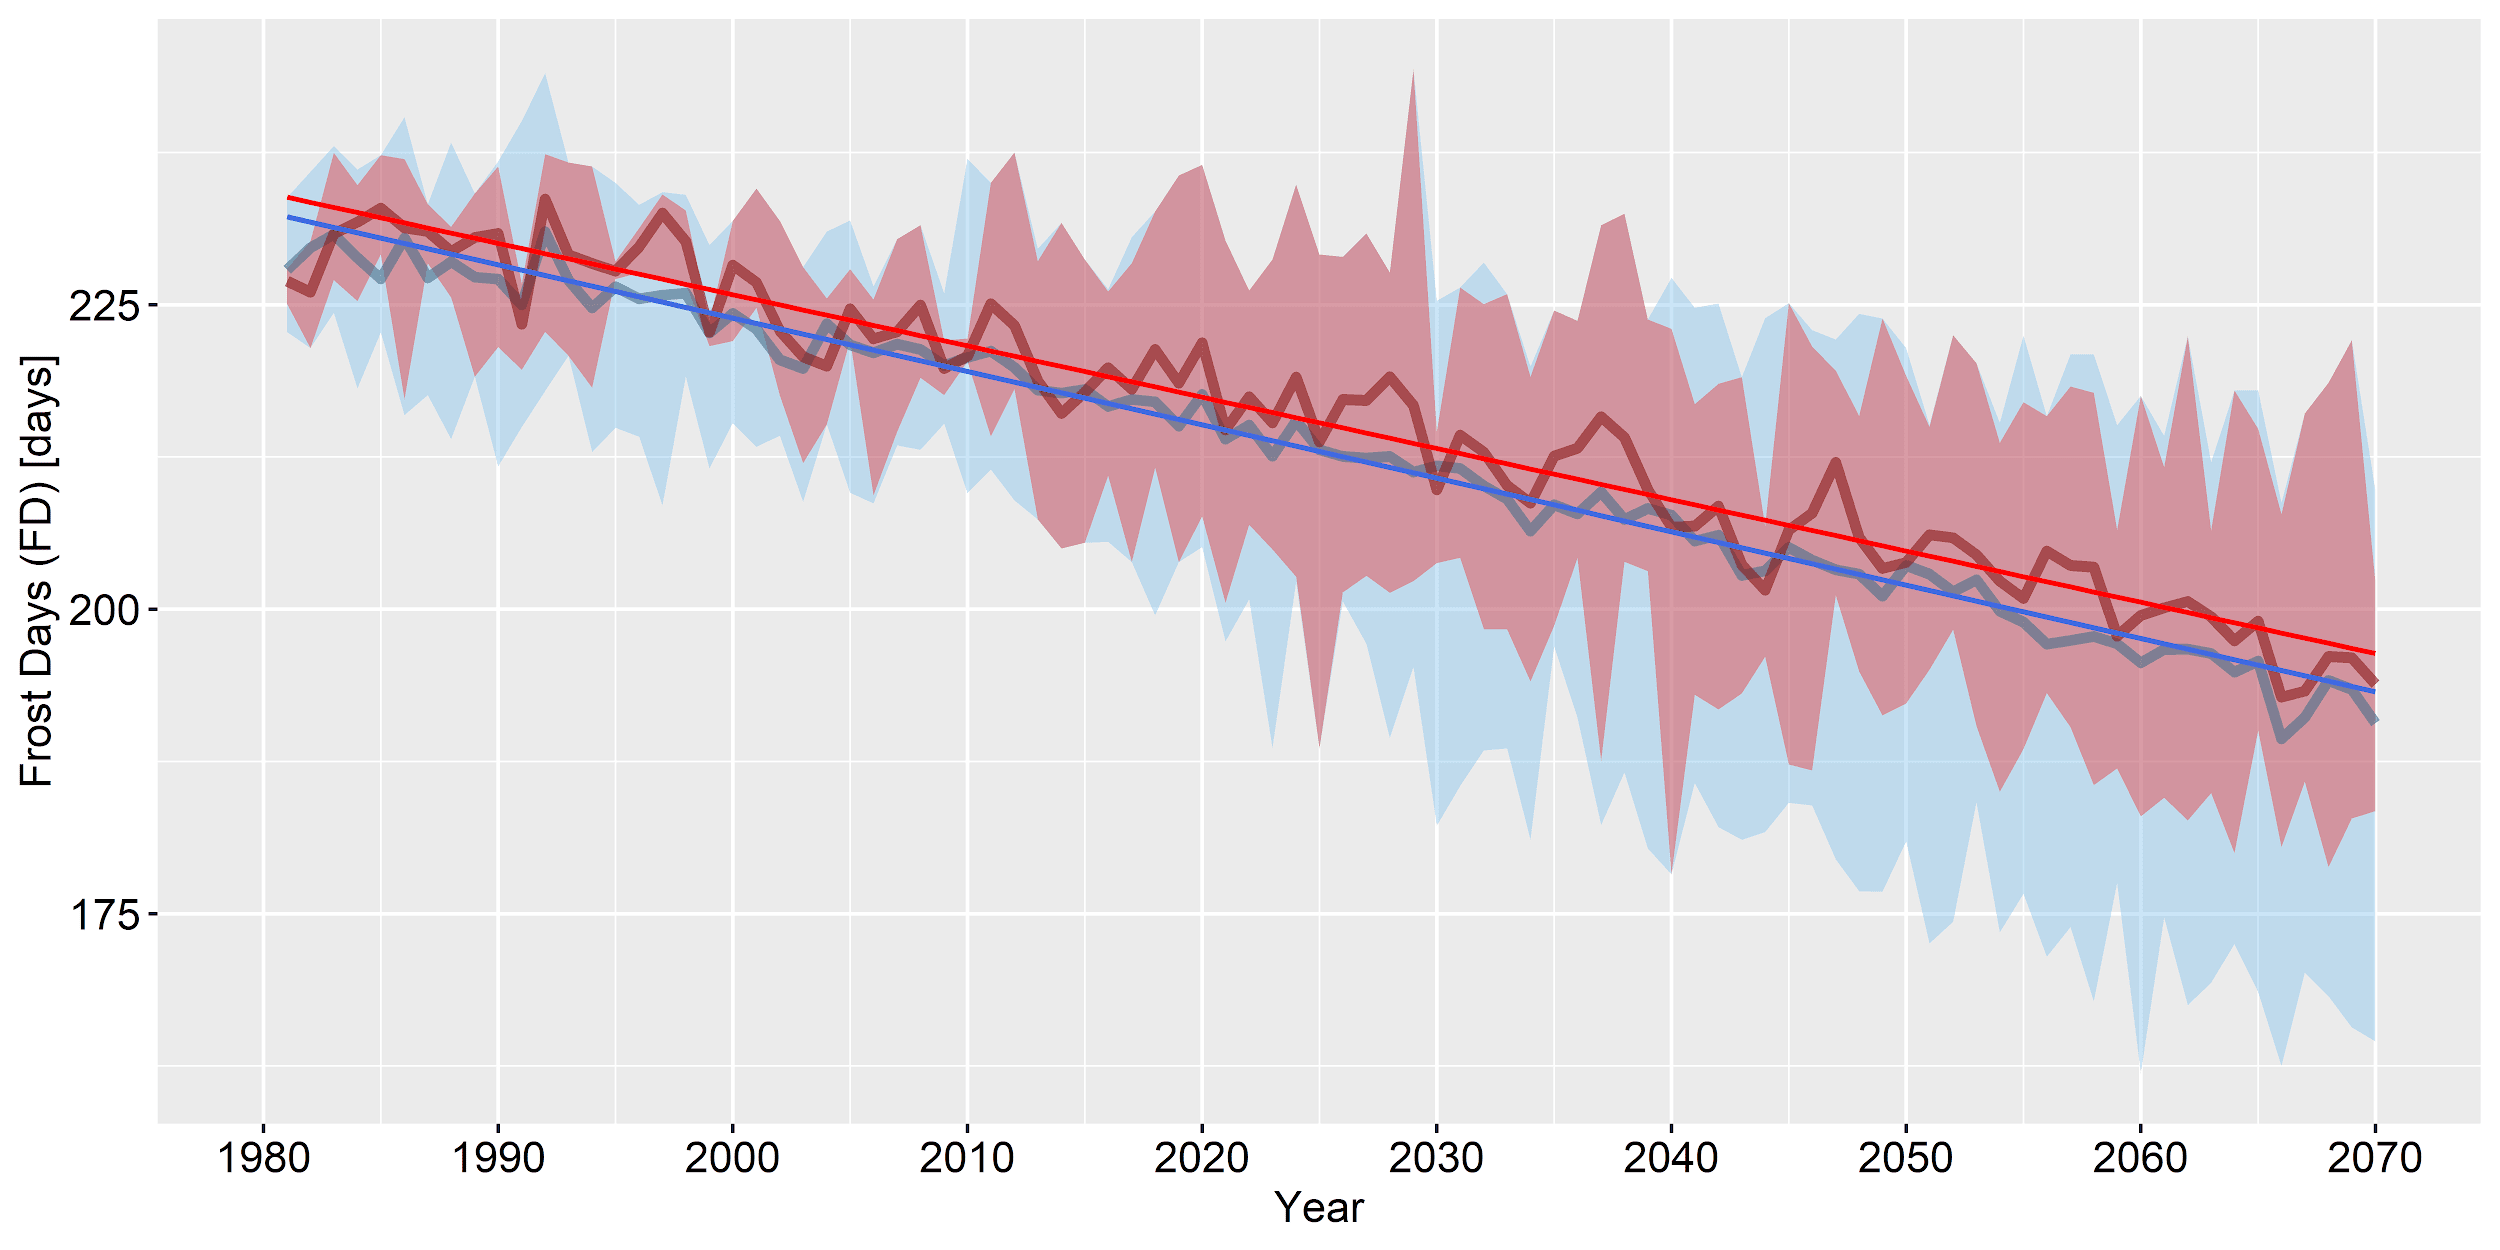


**Figure S9. Trend in ENS and SUB FD annual means time series over the period 1981-2070.**

The non-linear blue and red lines represent ENS and SUB means respectively; the solid linear blue and red lines show ENS and SUB Mann-Kendall significant trends respectively; the light blue and red shading highlight respectively ENS and SUB simulations data range.


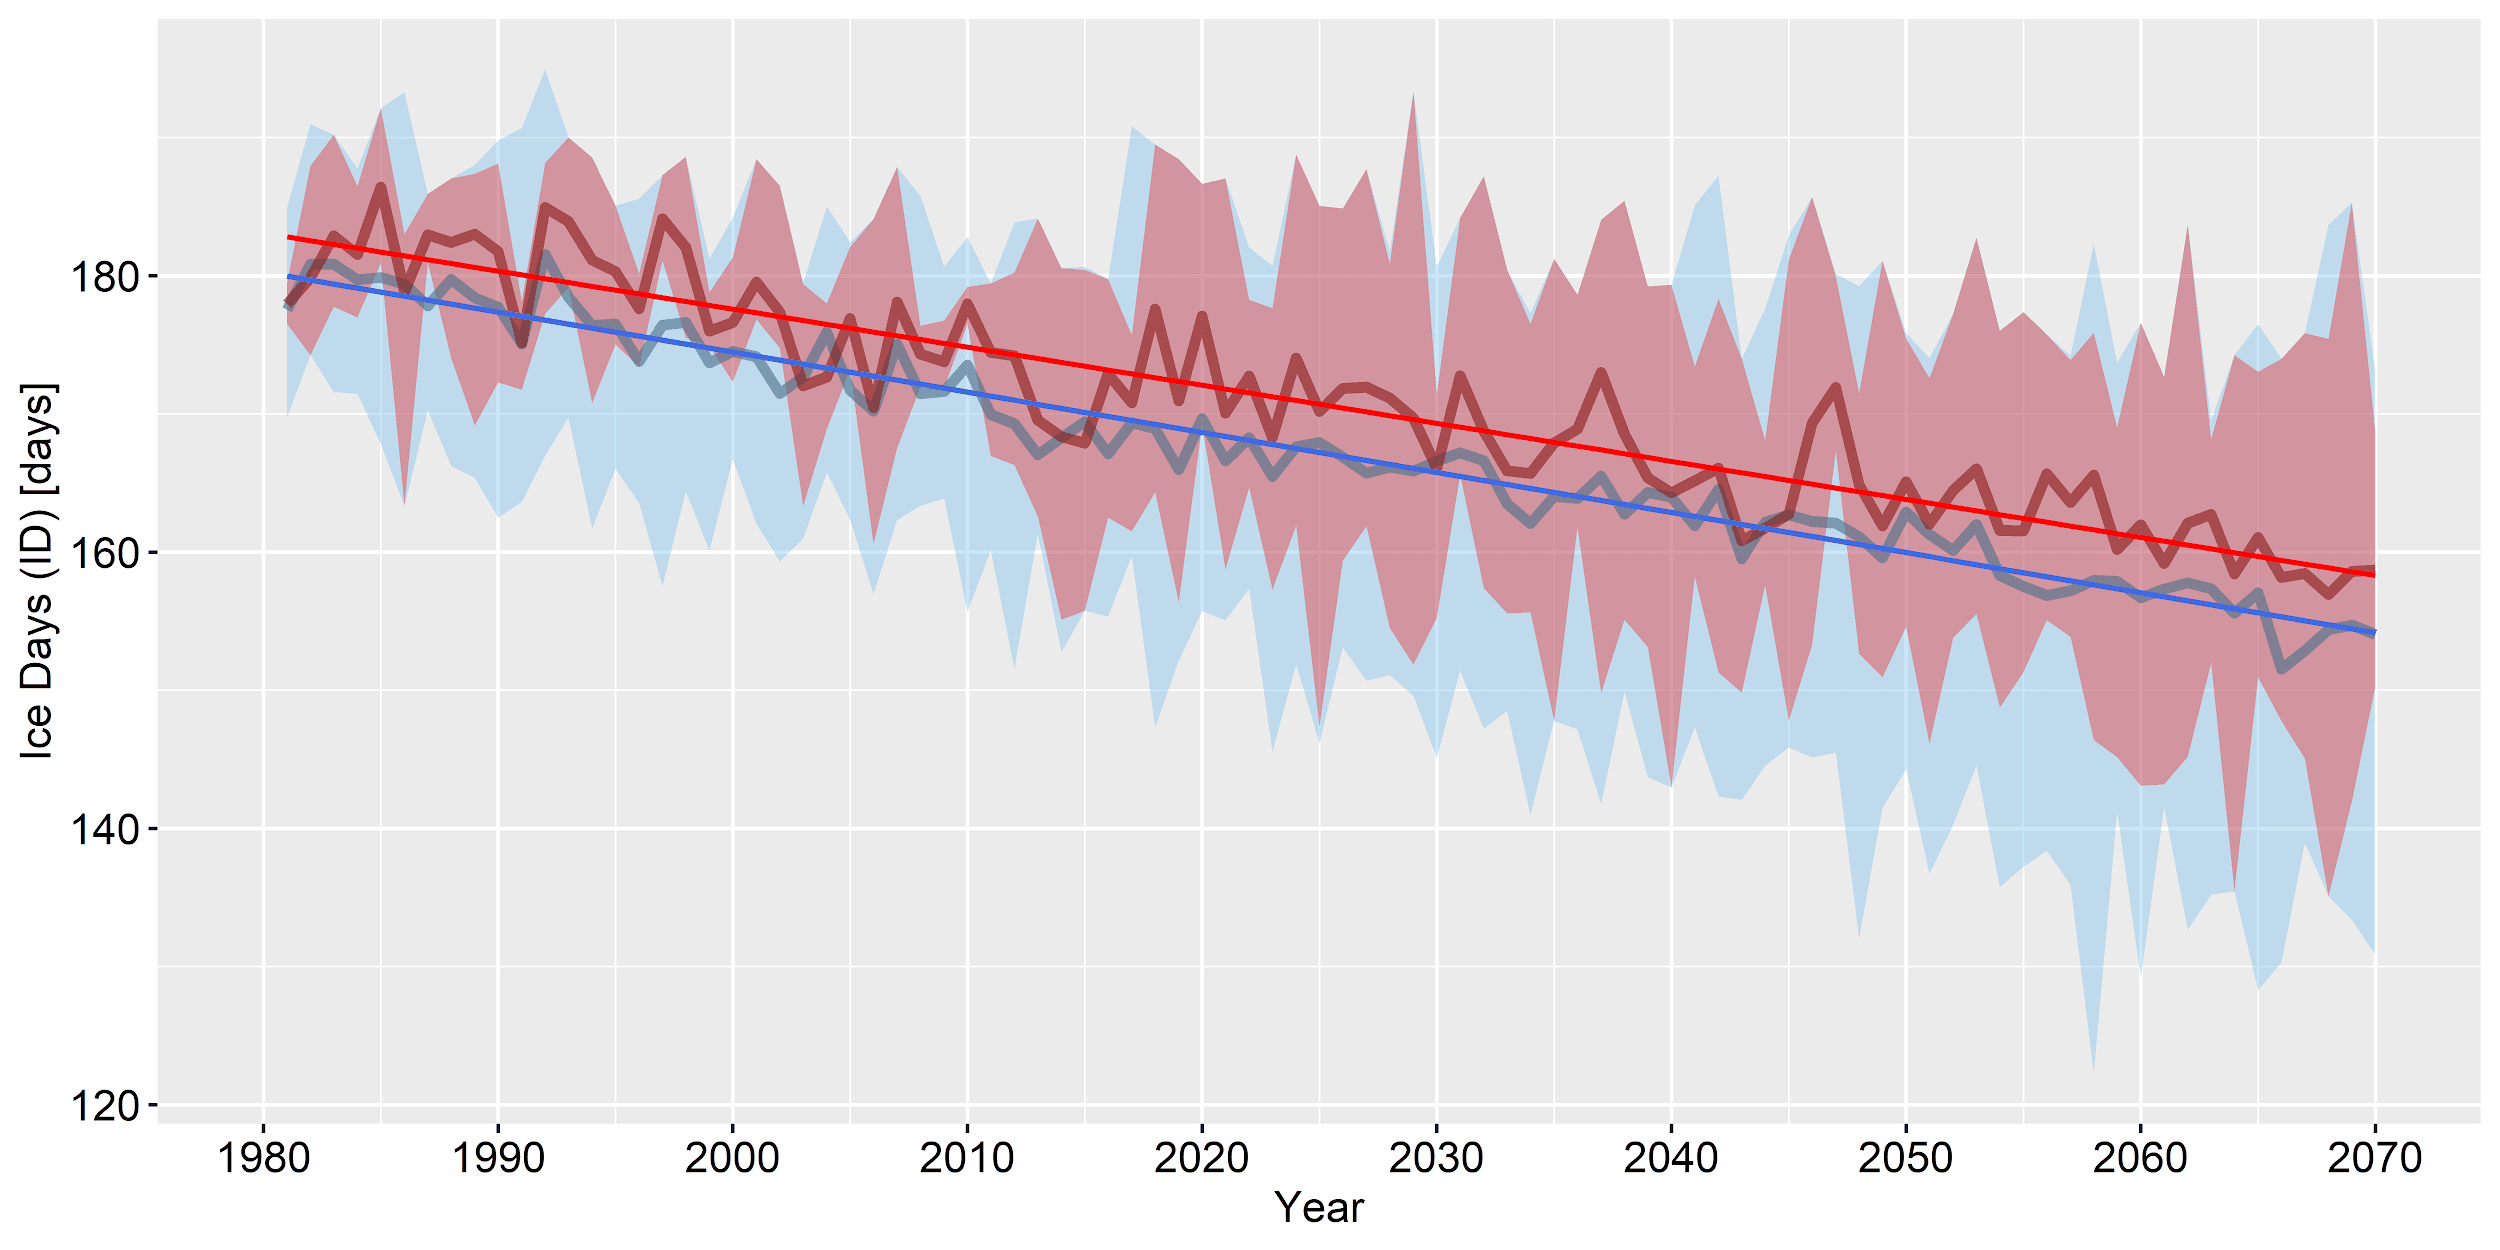


**Figure S10. Trend in ENS and SUB ID annual means time series over the period 1981-2070.**

The non-linear blue and red lines represent ENS and SUB means respectively; the solid linear blue and red lines show ENS and SUB Mann-Kendall significant trends respectively; the light blue and red shading highlight respectively ENS and SUB simulations data range.


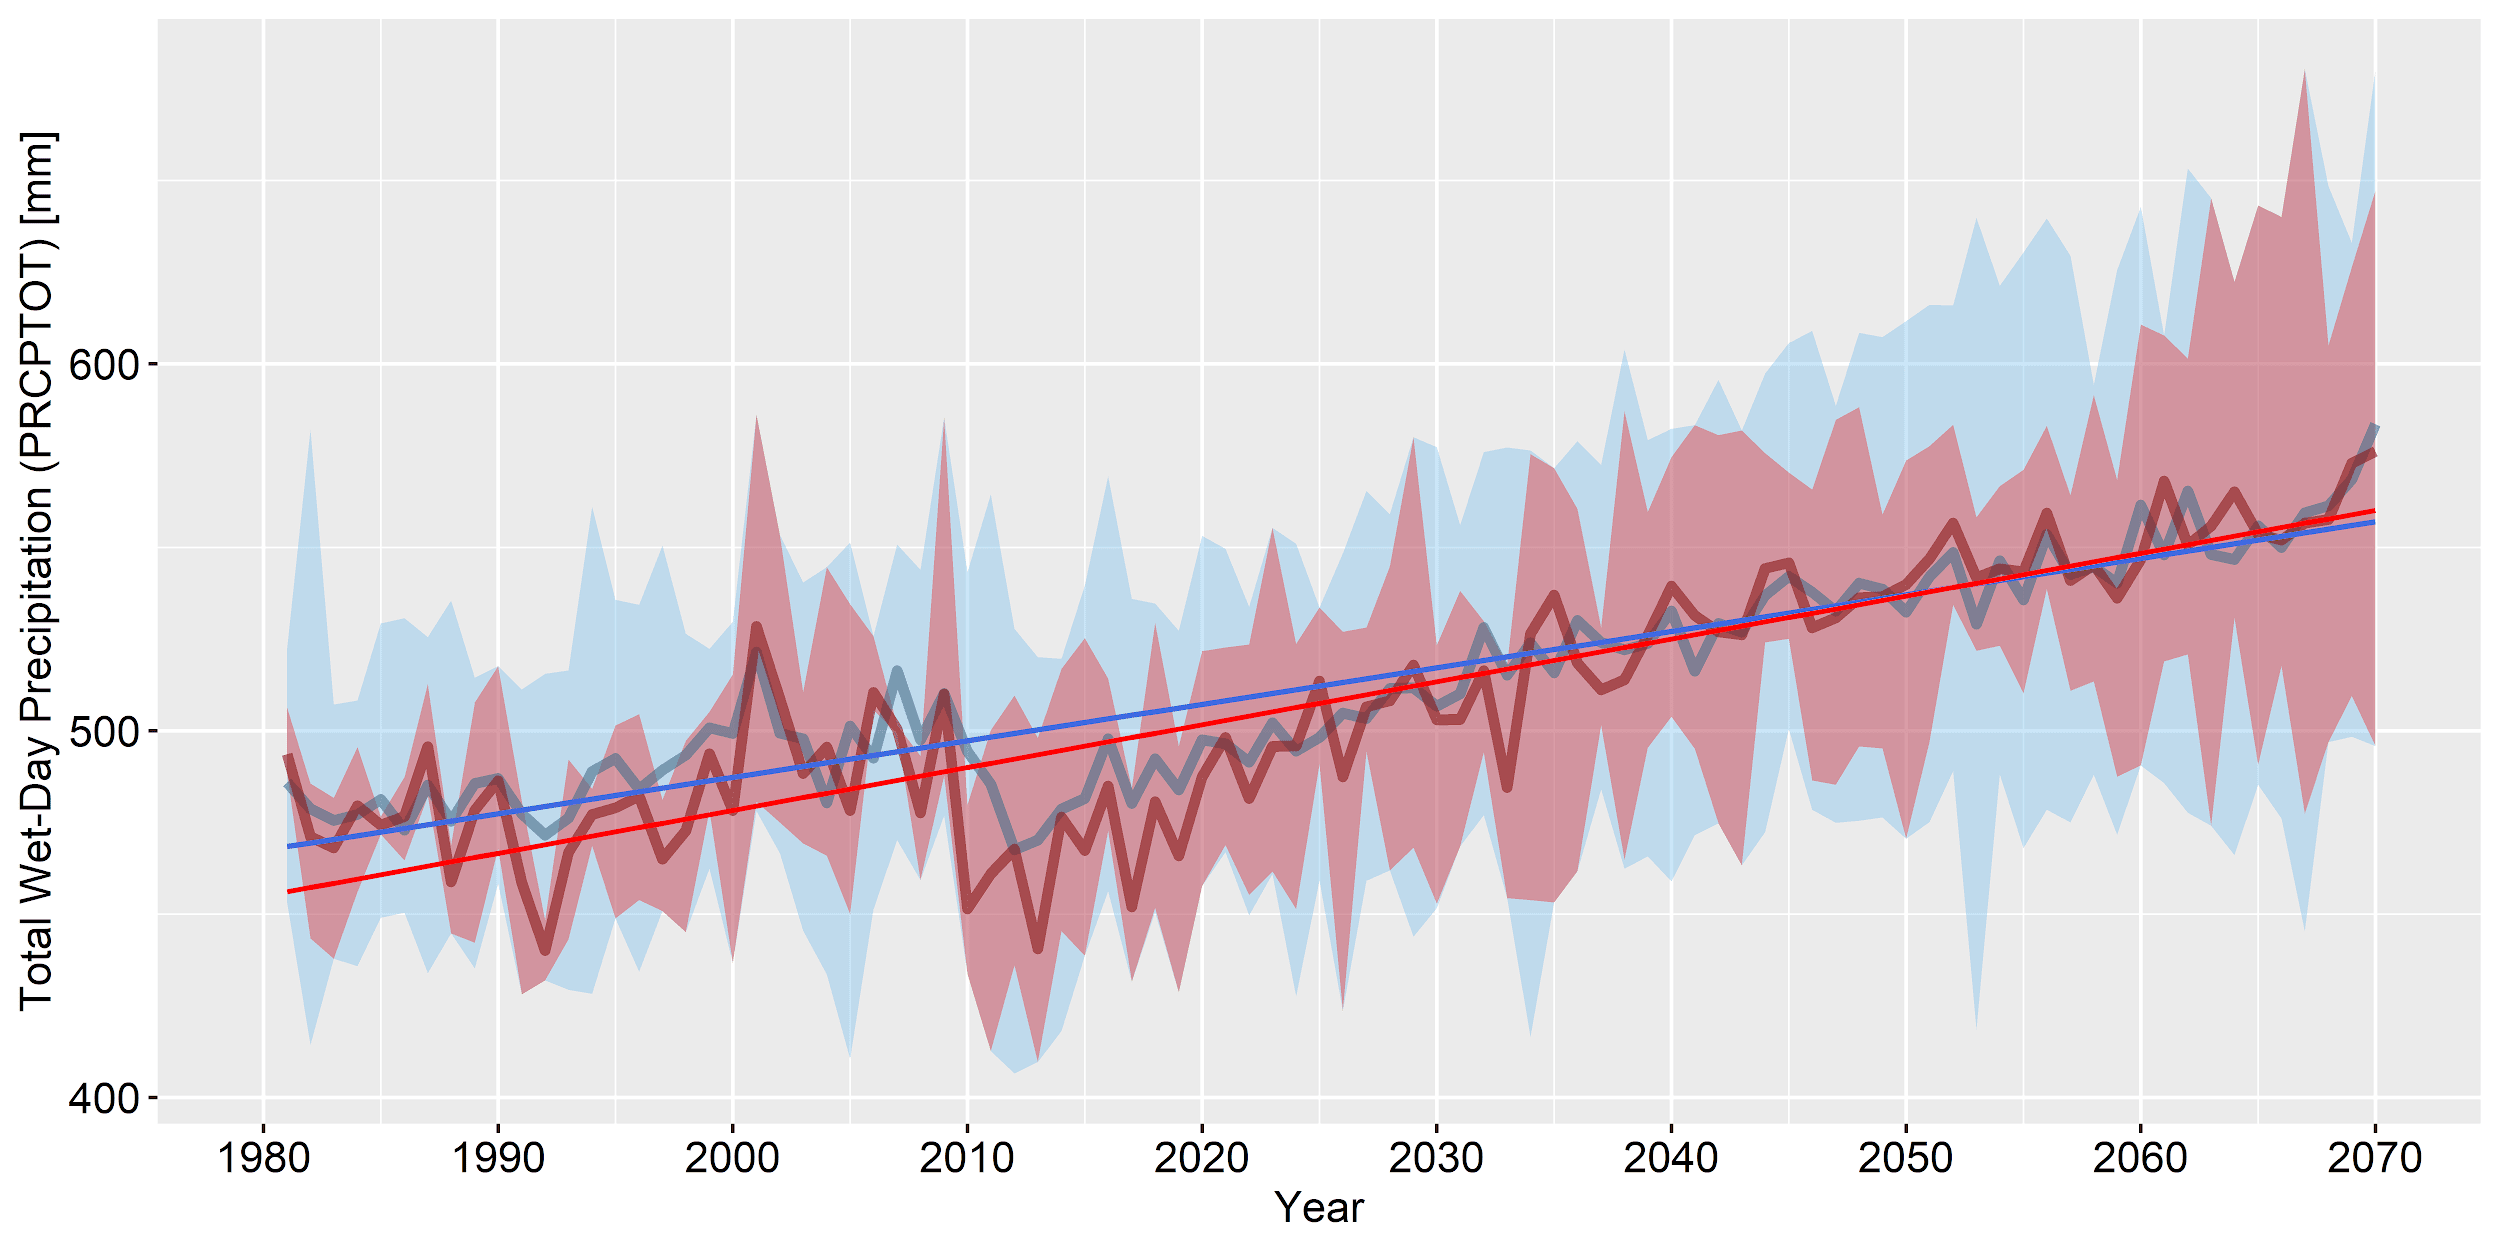


**Figure S11. Trend in ENS and SUB PRCPTOT annual means time series over the period 1981-2070.**

The non-linear blue and red lines represent ENS and SUB means respectively; the solid linear blue and red lines show ENS and SUB Mann-Kendall significant trends respectively; the light blue and red shading highlight respectively ENS and SUB simulations data range.


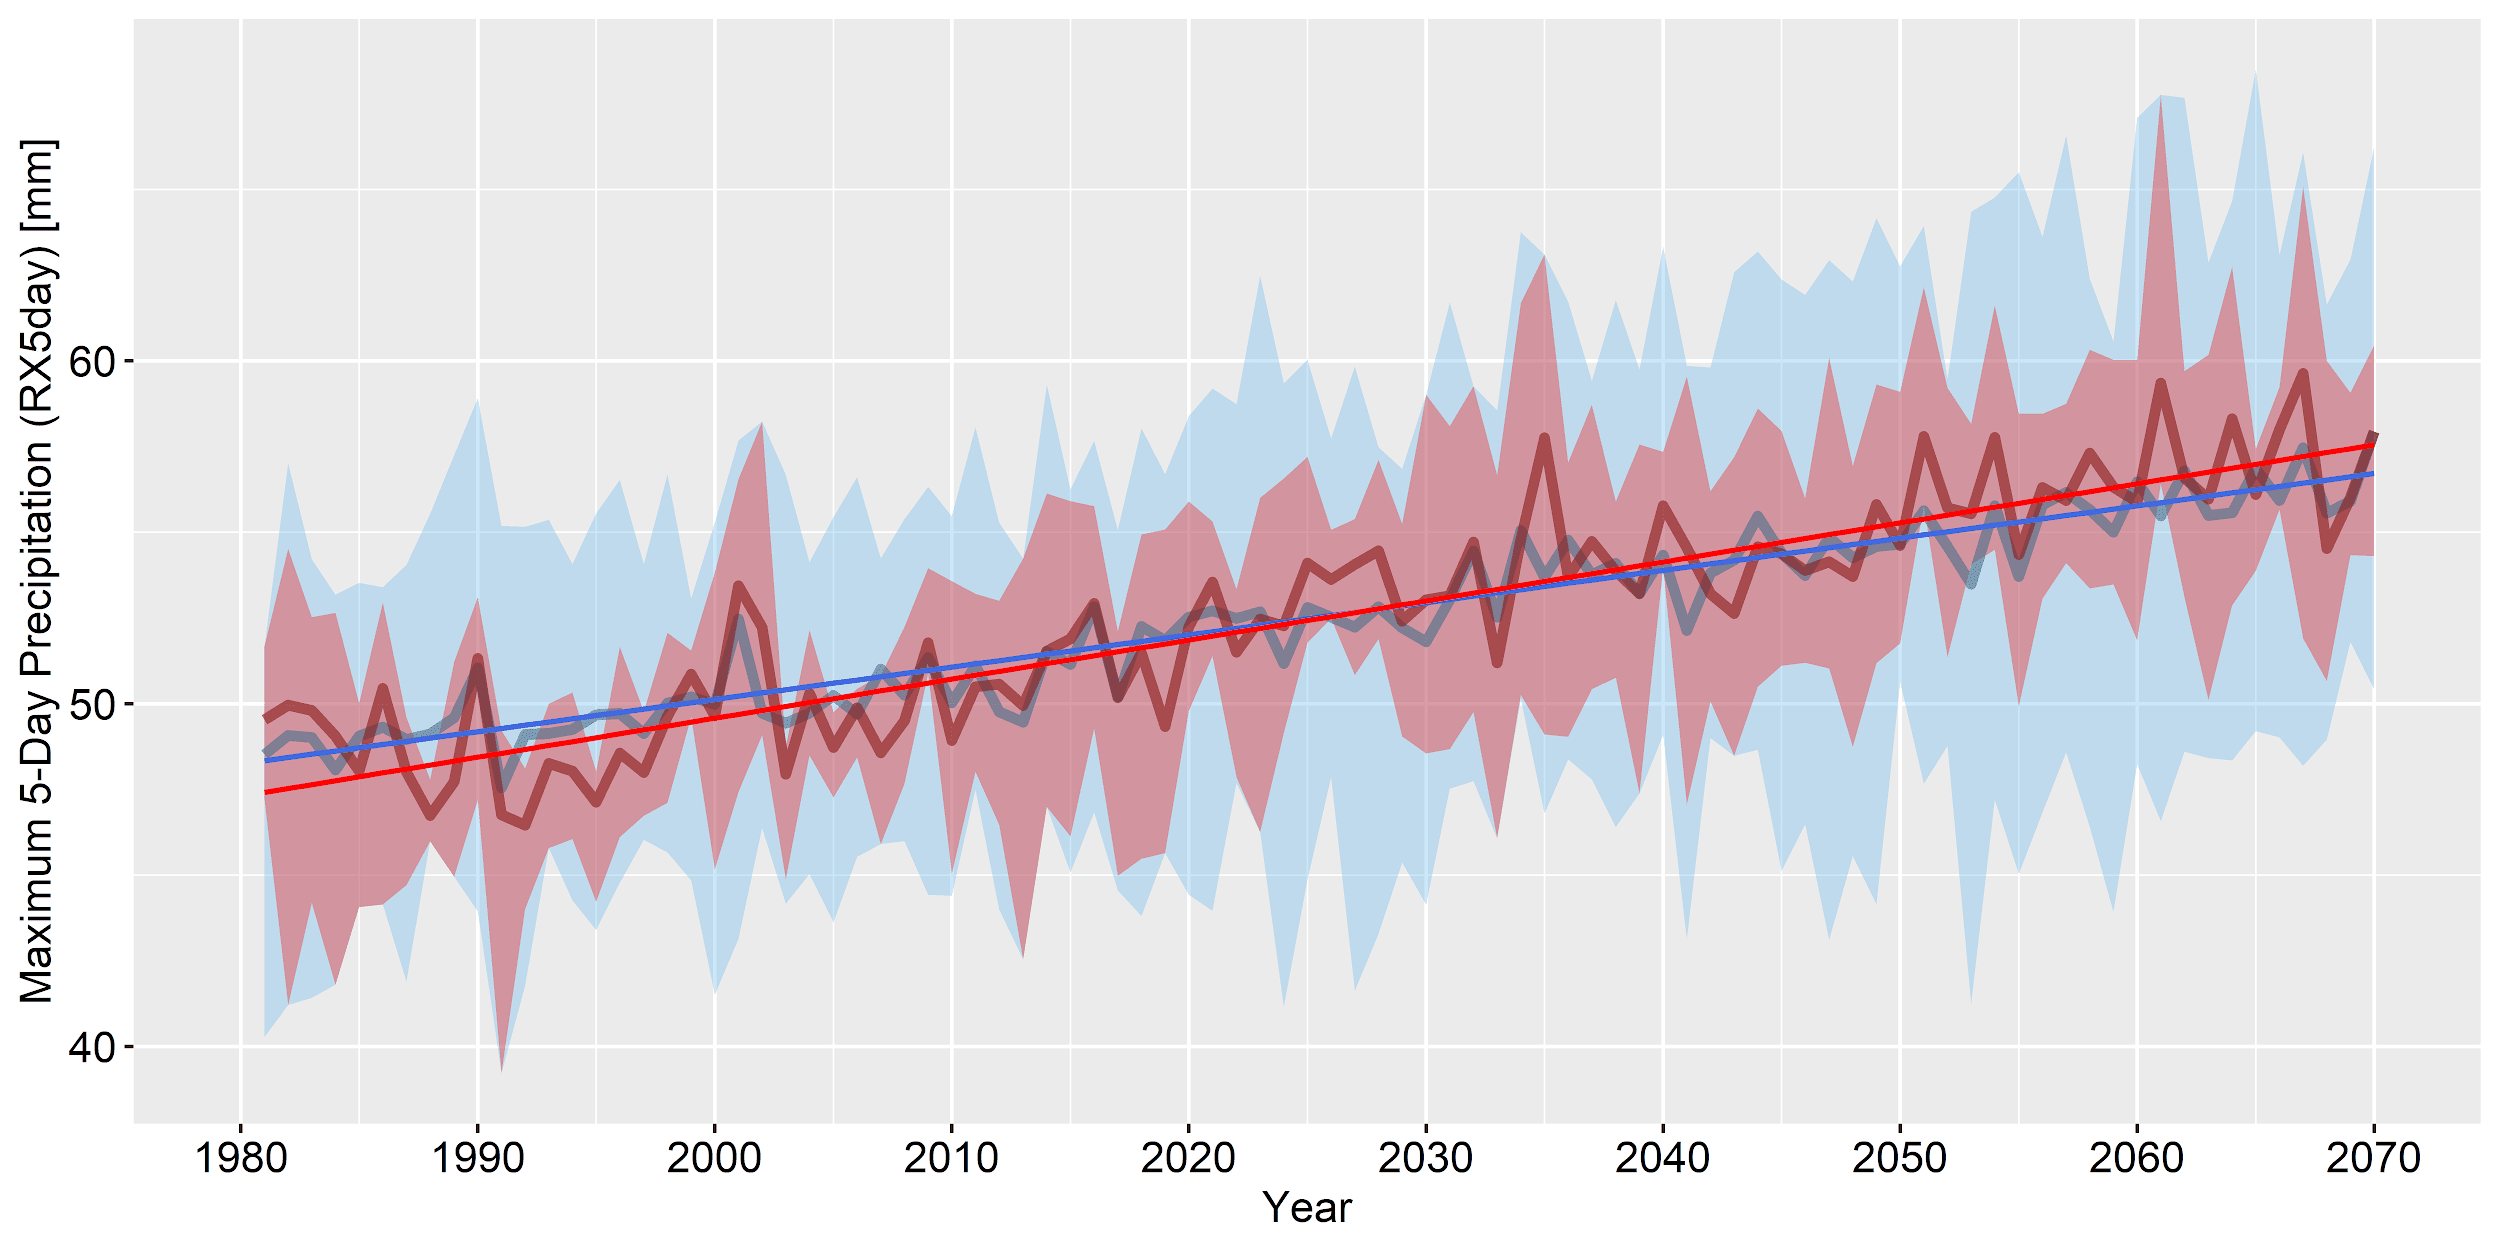


**Figure S12. Trend in ENS and SUB RX5day annual means time series over the period 1981-2070.**

The non-linear blue and red lines represent ENS and SUB means respectively; the solid linear blue and red lines show ENS and SUB Mann-Kendall significant trends respectively; the light blue and red shading highlight respectively ENS and SUB simulations data range.


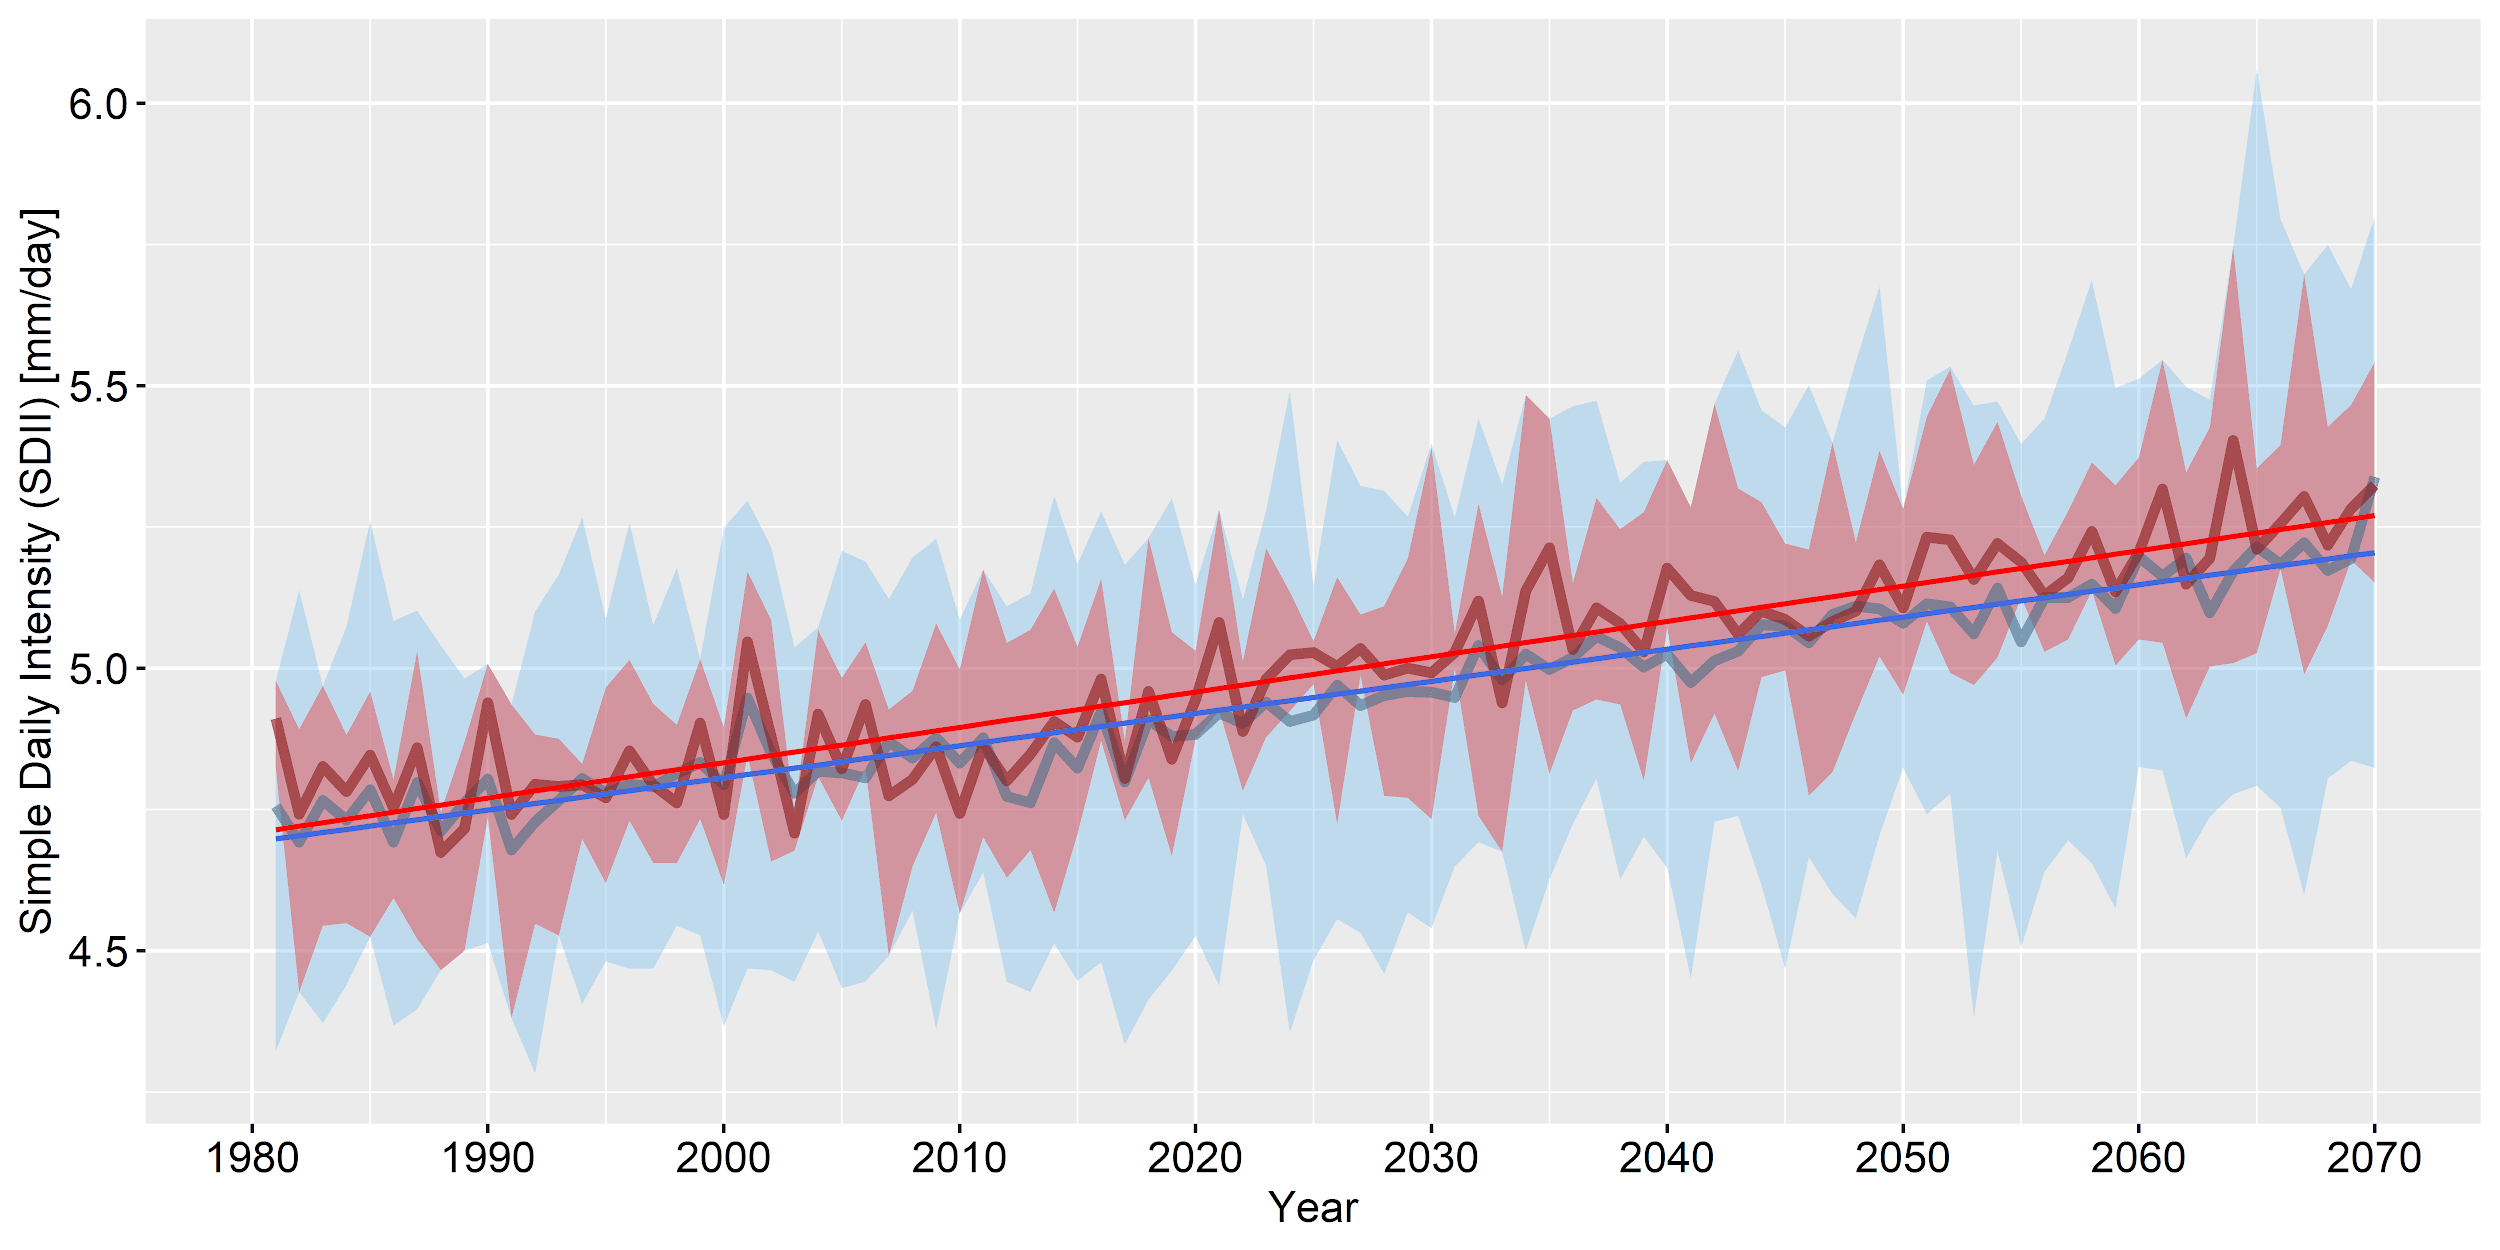


**Figure S13. Trend in ENS and SUB SDII annual means time series over the period 1981-2070.**

The non-linear blue and red lines represent ENS and SUB means respectively; the solid linear blue and red lines show ENS and SUB Mann-Kendall significant trends respectively; the light blue and red shading highlight respectively ENS and SUB simulations data range.


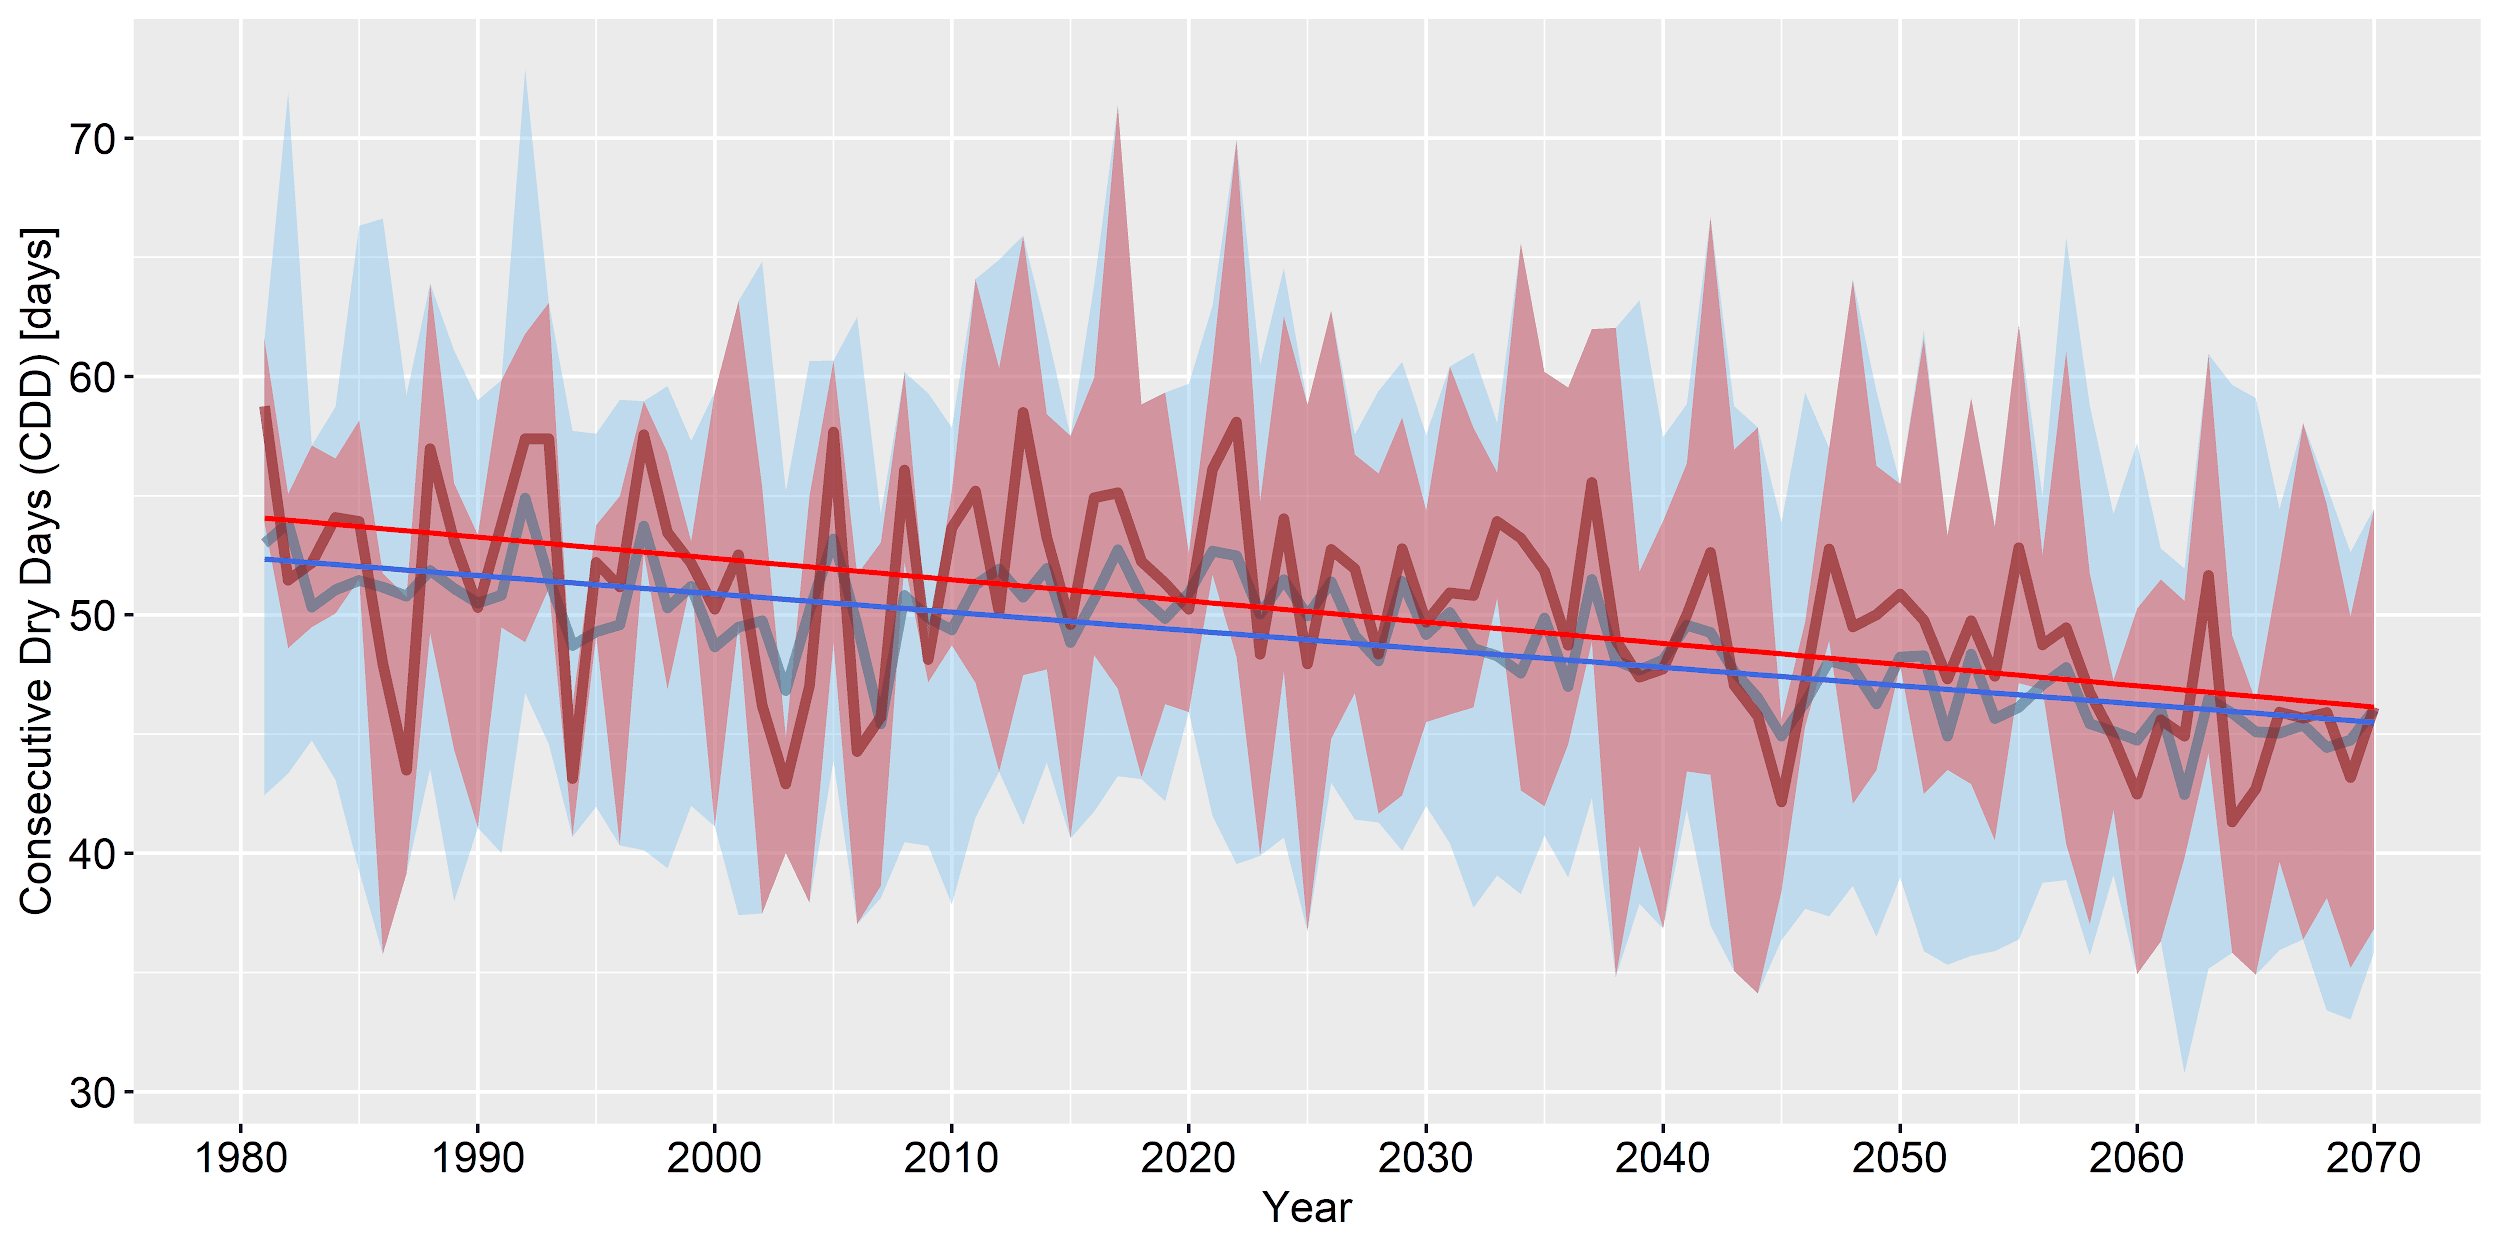


**Figure S14. Trend in ENS and SUB CDD annual means time series over the period 1981-2070.**

The non-linear blue and red lines represent ENS and SUB means respectively; the solid linear blue and red lines show ENS and SUB Mann-Kendall significant trends respectively; the light blue and red shading highlight respectively ENS and SUB simulations data range.
